# Supplementary material for: Mutual cross-feeding drives marine biofilm assembly on various carbon sources
Source: Research Square preprint supplement (doi:10.21203/rs.3.rs-3209408/v1), 2023-08-11
Supplement: Supplementary file 1 [file 2b8a69011e6d813bfd938a9e.xlsx]

## Sheet: Table_S1
Extended data Table 1 Information of carbon sources.
Alcohols	Sample name (oxygen+)	Sample name (oxygen-)	Amino acids	Sample name (oxygen+)	Sample name (oxygen-)	Organic acids	Sample name (oxygen+)	Sample name (oxygen-)	Saccharides	Sample name (oxygen+)	Sample name (oxygen-)
Salicylic alcohol	C1-1	C1-2	L-tyrosine	A1-1	A1-2	Acetic acid	S2-1	S2-2	L-Glucose	T2-1	T2-2
Ducitol	C2-1	C2-2	D-tyrosine	A2-1	A2-2	Octanoic acid	S7-1	S7-2	L-fucose	T3-1	T3-2
Mannitol	C3-1	C3-2	L-Cysteine	A3-1	A3-2	Fumaric acid	S9-1	S9-2	D-fucose	T4-1	T4-2
propan-1,3-diol	C6-1	C6-2	L-Alanine	A5-1	A5-2	D-Malic Acid	S10-1	S10-2	D-Arabinose	T5-1	T5-2
Erythritol	C7-1	C7-2	D-Alanine	A6-1	A6-2	α-ketoglutaric acid	S11-1	S11-2	L-Arabinose	T6-1	T6-2
Cholesterol	C9-1	C9-2	L-Glutamic acid	A7-1	A7-2	Lactic acid	S13-1	S13-2	L-Mannose	T7-1	T7-2
Xylitol	C10-1	C10-2	D-Glutamic acid	A8-1	A8-2	Taurine	S14-1	S14-2	Xylosucrose	T9-1	T9-2
maltitol	C11-1	C11-2	L-Tryptophan	A9-1	A9-2	Glyoxylic acid	S15-1	S15-2	D-Xylose	T11-1	T11-2
Hexane-1,2-diol	C12-1	C12-2	D-Tryptophan	A10-1	A10-2	Glycolic acid	S16-1	S16-2	L-Galactose	T14-1	T14-2
L-Arabitol	C13-1	C13-2	L-Serine	A11-1	A11-2	D-gluconic acid	S17-1	S17-2	D-Fructose	T15-1	T15-2
L- sorbitol	C14-1	C14-2	D-Serine	A12-1	A12-2	Glucuronic acid	S18-1	S18-2	L-Rhamnose	T18-1	T18-2
Ethanol	C16-1	C16-2	L-Leucine	A13-1	A13-2	Pyruvic acid	S20-1	S20-2	Inulin	T19-1	T19-2
Glycerol	C17-1	C17-2	D-Leucine	A14-1	A14-2	Oxaloacetic acid	S21-1	S21-2	Starch soluble	T23-1	T23-2
Pentanol	C19-1	C19-2	D-Asparagine	A15-1	A15-2	Citric acid	S22-1	S22-2	hyaluronic acid	T25-1	T25-2
Inositol	C20-1	C20-2	D-Glutamine	A17-1	A17-2	Acrylic acid	S23-1	S23-2
D-Arabitol	C21-1	C21-2	L-Glutamine	A18-1	A18-2
D-Sorbitol	C22-1	C22-2	L-Histidine	A19-1	A19-2
			D-Histidine	A20-1	A20-2
			L-Methionine	A21-1	A21-2
			L-Phenylalanine	A23-1	A23-2
			D-Phenylalanine	A24-1	A24-2
			L-Threonine	A25-1	A25-2
			Sarcosine	A27-1	A27-2

## Sheet: Table_S2
Extended data Table 2 Information of the metagenomic datasets (Illumina).
Sample name	Raw Reads Number	Raw Bases Number	Clean Reads Number	Clean Reads Rate (%)	Clean Bases Number	Low-Quality Reads Number	Low-Quality Reads Rate (%)	Adapter Polluted Reads Number	Adapter Polluted Reads Rate (%)	Raw Q30 Bases Rate (%)	Clean Q30 Bases Rate (%)	Data accession in CNCB
C1-1	148960680	22344102000	148540012	99.72	22281001800	0	0	365482	0.24	91.69	91.69	CRR500714
C2-1	160376482	24056472300	159965150	99.74	23994772500	0	0	346924	0.22	91.12	91.12	CRR500716
C3-1	158415892	23762383800	156982896	99.09	23547434400	0	0	717018	0.45	87	87.02	CRR500718
C6-1	134029768	20104465200	133021620	99.25	19953243000	0	0	503570	0.38	86.23	86.25	CRR500720
C7-1	155393836	23309075400	154861944	99.66	23229291600	0	0	462460	0.3	92.29	92.3	CRR500722
C9-1	155644976	23346746400	154118146	99.02	23117721900	0	0	699184	0.45	88.38	88.41	CRR500724
C10-1	159086996	23863049400	158562352	99.67	23784352800	0	0	449482	0.28	92.4	92.41	CRR500726
C11-1	154654836	23198225400	153039768	98.96	22955965200	0	0	608158	0.39	88.96	89	CRR500728
C12-1	151135976	22670396400	149825112	99.13	22473766800	0	0	610726	0.4	86.97	86.99	CRR500730
C13-1	157793404	23669010600	157283806	99.68	23592570900	0	0	444958	0.28	92.55	92.56	CRR500732
C14-1	159739522	23960928300	159388148	99.78	23908222200	0	0	284890	0.18	87.18	87.19	CRR500734
C16-1	147381850	22107277500	146714694	99.55	22007204100	0	0	660452	0.45	91.68	91.69	CRR500736
C17-1	142741282	21411192300	141566240	99.18	21234936000	0	0	601200	0.42	86.21	86.24	CRR500738
C19-1	132518516	19877777400	131379734	99.14	19706960100	0	0	612556	0.46	86.5	86.52	CRR500740
C20-1	136210336	20431550400	135144748	99.22	20271712200	0	0	528946	0.39	84.31	84.33	CRR500742
C21-1	156735436	23510315400	155348744	99.11	23302311600	0	0	574920	0.37	88.63	88.67	CRR500744
C22-1	151012860	22651929000	150244460	99.49	22536669000	0	0	756566	0.5	91.14	91.15	CRR500746
C1-2	154718488	23207773200	153980654	99.52	23097098100	0	0	729802	0.47	91.18	91.19	CRR500715
C2-2	151509066	22726359900	150851046	99.57	22627656900	0	0	650040	0.43	90.86	90.87	CRR500717
C3-2	151433284	22714992600	150208234	99.19	22531235100	0	0	535652	0.35	86.75	86.78	CRR500719
C6-2	151080164	22662024600	149298796	98.82	22394819400	0	0	656172	0.43	88.46	88.52	CRR500721
C7-2	152721890	22908283500	152038020	99.55	22805703000	0	0	673650	0.44	92.23	92.24	CRR500723
C9-2	152125960	22818894000	150660366	99.04	22599054900	0	0	731378	0.48	88.01	88.04	CRR500725
C10-2	159173160	23875974000	158525606	99.59	23778840900	0	0	630874	0.4	91.52	91.52	CRR500727
C11-2	160557344	24083601600	158749764	98.87	23812464600	0	0	948230	0.59	88.67	88.7	CRR500729
C12-2	150390440	22558566000	149084468	99.13	22362670200	0	0	651358	0.43	87.65	87.68	CRR500731
C13-2	156834962	23525244300	156016450	99.48	23402467500	0	0	811076	0.52	92.16	92.18	CRR500733
C14-2	148984192	22347628800	148322704	99.56	22248405600	0	0	652120	0.44	91.37	91.38	CRR500735
C16-2	155186660	23277999000	154629424	99.64	23194413600	0	0	479444	0.31	92.42	92.43	CRR500737
C17-2	157692756	23653913400	156193252	99.05	23428987800	0	0	761042	0.48	87.76	87.79	CRR500739
C19-2	159048068	23857210200	157519842	99.04	23627976300	0	0	840790	0.53	85.87	85.89	CRR500741
C20-2	133587134	20038070100	132702554	99.34	19905383100	0	0	396710	0.3	86.31	86.33	CRR500743
C21-2	160402574	24060386100	159181872	99.24	23877280800	0	0	527814	0.33	86.65	86.68	CRR500745
C22-2	150242686	22536402900	149739182	99.67	22460877300	0	0	439774	0.29	90.94	90.94	CRR500747
A1-1	147838724	22175808600	147391868	99.7	22108780200	0	0	425960	0.29	92.37	92.38	CRR500668
A2-1	151798054	22769708100	150238058	98.97	22535708700	0	0	631766	0.42	87.73	87.78	CRR500670
A3-1	152210016	22831502400	150105192	98.62	22515778800	0	0	1009074	0.66	89.13	89.19	CRR500672
A5-1	157330674	23599601100	155166564	98.62	23274984600	0	0	946228	0.6	89.03	89.08	CRR500674
A6-1	155936018	23390402700	153987732	98.75	23098159800	0	0	897158	0.57	88.68	88.73	CRR500676
A7-1	156660146	23499021900	156149904	99.67	23422485600	0	0	502102	0.32	91.63	91.63	CRR500678
A8-1	150208104	22531215600	148873384	99.11	22331007600	0	0	430054	0.29	87.15	87.2	CRR500680
A9-1	153168148	22975222200	152698818	99.69	22904822700	0	0	458980	0.3	92.28	92.28	CRR500682
A10-1	160011916	24001787400	159495672	99.68	23924350800	0	0	506566	0.32	91.9	91.9	CRR500684
A11-1	149352522	22402878300	148730474	99.58	22309571100	0	0	601142	0.4	92.84	92.85	CRR500686
A12-1	156407600	23461140000	155802624	99.61	23370393600	0	0	592912	0.38	93.22	93.23	CRR500688
A13-1	157338192	23600728800	156812780	99.67	23521917000	0	0	517422	0.33	90.76	90.76	CRR500690
A14-1	158635772	23795365800	157784686	99.46	23667702900	0	0	843618	0.53	92.09	92.09	CRR500692
A15-1	133764292	20064643800	133305880	99.66	19995882000	0	0	449254	0.34	92.51	92.52	CRR500694
A17-1	148365408	22254811200	147933668	99.71	22190050200	0	0	424314	0.29	89.99	89.99	CRR500696
A18-1	160696402	24104460300	158696074	98.75	23804411100	0	0	840652	0.52	89.33	89.39	CRR500698
A19-1	156125356	23418803400	154170008	98.75	23125501200	0	0	761156	0.49	88.81	88.87	CRR500700
A20-1	149154356	22373153400	147865680	99.14	22179852000	0	0	581034	0.39	85.09	85.13	CRR500702
A21-1	155816666	23372499900	155309146	99.67	23296371900	0	0	493094	0.32	92.97	92.97	CRR500704
A23-1	150196844	22529526600	149640476	99.63	22446071400	0	0	546162	0.36	92.71	92.71	CRR500706
A24-1	155416814	23312522100	153628508	98.85	23044276200	0	0	657368	0.42	87.81	87.87	CRR500708
A25-1	150680496	22602074400	150011592	99.56	22501738800	0	0	654360	0.43	88.47	88.47	CRR500710
A27-1	158132448	23719867200	156660278	99.07	23499041700	0	0	573404	0.36	88.08	88.13	CRR500712
A1-2	155894024	23384103600	155387686	99.67	23308152900	0	0	496616	0.32	92.39	92.4	CRR500669
A2-2	151469612	22720441800	149945192	98.99	22491778800	0	0	685410	0.45	87.6	87.64	CRR500671
A3-2	157023060	23553459000	156117992	99.42	23417698800	0	0	890430	0.57	88.22	88.21	CRR500673
A5-2	157536012	23630401800	155805946	98.9	23370891900	0	0	690266	0.44	88.84	88.89	CRR500675
A6-2	154307438	23146115700	152497726	98.83	22874658900	0	0	676080	0.44	87.97	88.03	CRR500677
A7-2	148023316	22203497400	147430854	99.6	22114628100	0	0	585542	0.4	92.88	92.89	CRR500679
A8-2	151261478	22689221700	149599748	98.9	22439962200	0	0	403202	0.27	88.35	88.43	CRR500681
A9-2	153358318	23003747700	152902794	99.7	22935419100	0	0	445772	0.29	90.98	90.98	CRR500683
A10-2	154944258	23241638700	154516754	99.72	23177513100	0	0	418342	0.27	90.42	90.42	CRR500685
A11-2	147439978	22115996700	146784878	99.56	22017731700	0	0	644836	0.44	93.38	93.38	CRR500687
A12-2	155221632	23283244800	154681606	99.65	23202240900	0	0	529136	0.34	92.77	92.77	CRR500689
A13-2	148025360	22203804000	147614906	99.72	22142235900	0	0	402328	0.27	91.11	91.11	CRR500691
A14-2	153805640	23070846000	153331166	99.69	22999674900	0	0	465310	0.3	92.3	92.3	CRR500693
A15-2	150350664	22552599600	149740506	99.59	22461075900	0	0	600398	0.4	92.97	92.97	CRR500695
A17-2	158362930	23754439500	157979876	99.76	23696981400	0	0	375160	0.24	89.94	89.94	CRR500697
A18-2	157016346	23552451900	155035686	98.74	23255352900	0	0	904552	0.58	88.87	88.92	CRR500699
A19-2	161022382	24153357300	159861270	99.28	23979190500	0	0	1153670	0.72	89.01	88.99	CRR500701
A20-2	156079100	23411865000	154132812	98.75	23119921800	0	0	830304	0.53	86.56	86.61	CRR500703
A21-2	151512534	22726880100	151016798	99.67	22652519700	0	0	482964	0.32	92.98	92.98	CRR500705
A23-2	153858860	23078829000	153314254	99.65	22997138100	0	0	534114	0.35	92.75	92.75	CRR500707
A24-2	161031426	24154713900	159405018	98.99	23910752700	0	0	702618	0.44	87.57	87.61	CRR500709
A25-2	149422272	22413340800	147550058	98.75	22132508700	0	0	676992	0.45	88.58	88.65	CRR500711
A27-2	153231888	22984783200	151532202	98.89	22729830300	0	0	704150	0.46	88.61	88.66	CRR500713
S2-1	156587422	23488113300	155803396	99.5	23370509400	0	0	710542	0.45	92.89	92.89	CRR500748
S7-1	152681122	22902168300	151195688	99.03	22679353200	0	0	524236	0.34	87.49	87.55	CRR500750
S9-1	151604682	22740702300	148615432	98.03	22292314800	0	0	1311514	0.86	89.85	89.92	CRR500752
S10-1	159489118	23923367700	157018806	98.45	23552820900	0	0	822220	0.52	89.37	89.46	CRR500754
S11-1	161179426	24176913900	158842304	98.55	23826345600	0	0	1173542	0.73	89.4	89.45	CRR500756
S13-1	158700274	23805041100	156909294	98.87	23536394100	0	0	601204	0.38	88.59	88.65	CRR500758
S14-1	153466618	23019992700	152793604	99.56	22919040600	0	0	591630	0.39	92.73	92.74	CRR500760
S15-1	148847494	22327124100	148068308	99.48	22210246200	0	0	770010	0.52	87.35	87.34	CRR500762
S16-1	151211444	22681716600	150363096	99.44	22554464400	0	0	791714	0.52	91.47	91.48	CRR500764
S17-1	151409288	22711393200	149877400	98.99	22481610000	0	0	651228	0.43	88.58	88.62	CRR500766
S18-1	139744838	20961725700	138697952	99.25	20804692800	0	0	1038632	0.74	88.14	88.12	CRR500768
S20-1	158126492	23718973800	157518122	99.61	23627718300	0	0	523576	0.33	91.84	91.84	CRR500770
S21-1	154619866	23192979900	153242924	99.11	22986438600	0	0	651738	0.42	87.18	87.21	CRR500772
S22-1	149051672	22357750800	147744576	99.12	22161686400	0	0	602298	0.4	88.31	88.34	CRR500774
S23-1	151385020	22707753000	150940060	99.71	22641009000	0	0	390090	0.26	89.64	89.65	CRR500776
S2-2	156213702	23432055300	155554970	99.58	23333245500	0	0	591568	0.38	92.37	92.38	CRR500749
S7-2	159912216	23986832400	158723006	99.26	23808450900	0	0	526668	0.33	86.26	86.29	CRR500751
S9-2	153249604	22987440600	151939890	99.14	22790983500	0	0	597254	0.39	87.88	87.91	CRR500753
S10-2	159583850	23937577500	157966584	98.99	23694987600	0	0	844858	0.53	88.41	88.44	CRR500755
S11-2	153050438	22957565700	151780510	99.17	22767076500	0	0	640876	0.42	87.08	87.11	CRR500757
S13-2	151065470	22659820500	149250406	98.8	22387560900	0	0	1082908	0.72	88.89	88.91	CRR500759
S14-2	156729658	23509448700	156031614	99.56	23404742100	0	0	631440	0.4	93.11	93.11	CRR500761
S15-2	152634106	22895115900	151526924	99.28	22729038600	0	0	505300	0.33	86.46	86.48	CRR500763
S16-2	154714312	23207146800	154110806	99.61	23116620900	0	0	546056	0.35	90.99	90.99	CRR500765
S17-2	152823426	22923513900	151302722	99	22695408300	0	0	688324	0.45	87.96	87.99	CRR500767
S18-2	150649824	22597473600	149031020	98.92	22354653000	0	0	649554	0.43	87.37	87.41	CRR500769
S20-2	149482552	22422382800	148879282	99.6	22331892300	0	0	549996	0.37	92.42	92.43	CRR500771
S21-2	158220954	23733143100	156590066	98.97	23488509900	0	0	970230	0.61	86.65	86.67	CRR500773
S22-2	156825714	23523857100	155315400	99.04	23297310000	0	0	689018	0.44	88.69	88.74	CRR500775
S23-2	148274136	22241120400	147904080	99.75	22185612000	0	0	309652	0.21	90.29	90.3	CRR500777
T2-1	153303252	22995487800	152792624	99.67	22918893600	0	0	463244	0.3	90.8	90.81	CRR500778
T3-1	159512322	23926848300	158969762	99.66	23845464300	0	0	462088	0.29	91.69	91.7	CRR500780
T4-1	158079400	23711910000	157521294	99.65	23628194100	0	0	509542	0.32	90.11	90.11	CRR500782
T5-1	147900432	22185064800	147304334	99.6	22095650100	0	0	536506	0.36	91.75	91.75	CRR500784
T6-1	153714940	23057241000	152485666	99.2	22872849900	0	0	492556	0.32	88.39	88.42	CRR500786
T7-1	153474806	23021220900	152273314	99.22	22840997100	0	0	513534	0.34	85.25	85.28	CRR500788
T9-1	158697502	23804625300	157230268	99.08	23584540200	0	0	773040	0.49	87.34	87.37	CRR500790
T11-1	152895906	22934385900	151685530	99.21	22752829500	0	0	525950	0.34	86.42	86.45	CRR500792
T14-1	157156772	23573515800	155558614	98.98	23333792100	0	0	727230	0.46	88.42	88.46	CRR500794
T15-1	158271008	23740651200	157681094	99.63	23652164100	0	0	521450	0.33	91.64	91.65	CRR500796
T18-1	149354284	22403142600	148163816	99.2	22224572400	0	0	584830	0.39	85.8	85.83	CRR500798
T19-1	158094958	23714243700	156707642	99.12	23506146300	0	0	510038	0.32	88.65	88.69	CRR500800
T23-1	155288520	23293278000	154801072	99.69	23220160800	0	0	418778	0.27	88.77	88.78	CRR500802
T25-1	159467526	23920128900	158760404	99.56	23814060600	0	0	619144	0.39	92.94	92.95	CRR500804
T2-2	160655720	24098358000	159895878	99.53	23984381700	0	0	701706	0.44	91.48	91.49	CRR500779
T3-2	148666176	22299926400	147904808	99.49	22185721200	0	0	696046	0.47	92.9	92.9	CRR500781
T4-2	150017500	22502625000	149428180	99.61	22414227000	0	0	578544	0.39	92.55	92.55	CRR500783
T5-2	148635078	22295261700	148080852	99.63	22212127800	0	0	542412	0.36	93.67	93.68	CRR500785
T6-2	150207196	22531079400	148884832	99.12	22332724800	0	0	592988	0.4	87.25	87.28	CRR500787
T7-2	156285938	23442890700	154832316	99.07	23224847400	0	0	594196	0.38	87.45	87.49	CRR500789
T9-2	156563654	23484548100	155165810	99.11	23274871500	0	0	661542	0.42	87.93	87.97	CRR500791
T11-2	155933672	23390050800	154637970	99.17	23195695500	0	0	536710	0.34	86.75	86.78	CRR500793
T14-2	147976794	22196519100	146639768	99.1	21995965200	0	0	689106	0.47	88.12	88.15	CRR500795
T15-2	149578452	22436767800	149207250	99.75	22381087500	0	0	364222	0.24	89.61	89.61	CRR500797
T18-2	156669982	23500497300	155246150	99.09	23286922500	0	0	618730	0.4	88.32	88.36	CRR500799
T19-2	151400646	22710096900	150110226	99.15	22516533900	0	0	576558	0.38	87.3	87.33	CRR500801
T23-2	160203268	24030490200	159505362	99.56	23925804300	0	0	688484	0.43	92.62	92.62	CRR500803
T25-2	150608600	22591290000	149980294	99.58	22497044100	0	0	611086	0.41	93.45	93.46	CRR500805

## Sheet: Table_S3
Extended data Table 3 Information of the metagenomic datasets (Nanopore).
Sample name	Clean Reads Number	Clean Bases Number	N50	Meanlength (bp)	Maxlength (bp)	MeanQscore	Data accession in CNCB
C-all	2646839	12847799057	8697	4854	127039	Q11	CRR500807
A-all	2257554	11785859107	9937	5220	90895	Q10	CRR500806
S-all	3333003	13966644084	6686	4190	120933	Q11	CRR500808
T-all	2829674	12733738358	9366	4500	128173	Q11	CRR500809

## Sheet: Table_S4
Extended data Table 4 Information of the assembled metagenomes.
Assembly sample name	Contigs	Largest contig (bp)	Total length (bp)	N50	GC(%)
C1	227059	735278	434924370	1742	49.524
C2	173263	838289	357701057	2577	50.051
C3	7519	319025	18348895	223	49.52
C6	246244	253082	382782821	895	48.687
C7	246828	785521	465990938	1711	49.814
C9	222677	1827606	362388013	612	46.383
C10	239780	1222106	461241203	1967	48.51
C11	237505	696385	392318945	631	45.808
C12	194386	757448	313329998	578	49.683
C13	198036	1375104	351944278	1611	46.822
C14	279795	685193	407930749	549	50.837
C16	261413	802104	434271691	704	46.45
C17	89354	519694	166695960	230	46.464
C19	249773	714764	420843214	726	49.134
C20	52901	718839	137148436	5463	50.537
C21	232907	568377	420991161	1584	48.088
C22	139014	665176	254004647	973	50.12
A1	178442	595118	287010705	665	48.949
A2	163897	1583327	249764498	334	48.774
A3	131745	437315	220003052	331	49.81
A5	214418	556266	315798444	408	46.055
A6	190176	581553	270218549	317	45.753
A7	130430	457726	208677619	527	46.257
A8	118205	381514	212755995	223	52.148
A9	183412	592602	309011012	906	51.721
A10	157686	328494	236222113	429	51.31
A11	244075	602687	384833668	630	46.837
A12	157920	591896	242500687	493	47.024
A13	195866	1253804	358360478	868	49.967
A14	137561	788848	231604053	700	50.797
A15	278054	919444	373534707	463	47.604
A17	173093	568469	268341179	591	52.548
A18	181643	489177	284226835	387	45.432
A19	183059	375947	277870222	443	47.244
A20	176611	1346069	295686153	1144	48.786
A21	192595	537738	324645493	776	48.857
A23	106770	2220727	188555925	559	46.022
A24	107281	595995	165217813	223	52.14
A25	203902	433185	326109070	480	46.009
A27	168354	1718494	286586475	1294	47.161
S2	320693	894854	462717430	921	46.131
S7	59264	1482164	132030141	2589	56.085
S9	301085	825127	466817257	1108	46.767
S10	288545	1232718	430571587	941	46.388
S11	262895	1416773	404288846	970	46.669
S13	290283	1020280	465401347	1078	47.399
S14	267414	463203	351479130	778	46.841
S15	311809	962031	486117808	1030	52.606
S16	315410	1313959	490161117	1132	50.958
S17	263252	1187063	450085913	1192	46.585
S18	262025	742923	454187949	1266	47.109
S20	298586	828135	566453629	1760	49.045
S21	259090	2065210	462868054	1276	48.156
S22	331940	1052538	510935383	1048	47.077
S23	93065	1126198	219950791	3342	53.159
T2	269434	1004677	468976876	1370	51.069
T3	266144	1178987	455268695	1405	48.146
T4	195366	1287244	454469810	3580	50.986
T5	216685	1201306	388063334	1581	48.021
T6	196146	1170178	374522883	1922	48.419
T7	253369	1002563	448524035	1323	50.659
T9	274147	1167526	473211113	1375	47.481
T11	41010	960261	134290246	11060	50.379
T14	213417	739380	364568795	1414	45.767
T15	29230	1016038	101741111	17914	51.652
T18	223806	1332671	401675414	1451	47.663
T19	268243	644751	463832223	1333	46.158
T23	20491	1163512	87673184	48193	56.671
T25	314863	1926443	473568608	1045	46.652

## Sheet: Table_S5
Extended data Table 5 Information of the 535 metagenome assembly genomes (MAGs).
MAGs	Contigs	Largest contig (bp)	Total length (bp)	N50	GC(%)	ORFs	Annotated ORFs	Phylum	Class	Order	Family	Genus	Species	Data accession in CNCB
AL001	72	625636	4239640	253762	5954	4078	1800	Proteobacteria	Alphaproteobacteria	Rhodobacterales	Rhodobacteraceae	Thioclava	--	GWHDOOU00000000
AL002	104	320434	4470600	68725	5353	4123	1756	Proteobacteria	Alphaproteobacteria	Rhodospirillales	Thalassospiraceae	Thalassospira	Thalassospira	GWHDOOV00000000
AL003	45	225105	2792062	107681	4400	2664	1471	Proteobacteria	Gammaproteobacteria	Nitrosococcales	Methylophagaceae	Methylophaga	--	GWHDOOW00000000
AL004	17	581248	3689273	295383	3617	3197	1175	Bacteroidota	Bacteroidia	Flavobacteriales	Flavobacteriaceae	Flaviramulus_A	--	GWHDOOX00000000
AL005	62	700872	3812982	152739	4604	3560	1823	Proteobacteria	Gammaproteobacteria	Pseudomonadales	Marinomonadaceae	Marinomonas	--	GWHDOOY00000000
AL006	31	632727	2876239	139321	3548	2619	1073	Bacteroidota	Bacteroidia	Flavobacteriales	Flavobacteriaceae	Mesonia	Mesonia	GWHDOOZ00000000
AL007	166	184128	5838956	56130	6419	5354	2032	Proteobacteria	Gammaproteobacteria	Burkholderiales	Burkholderiaceae	Achromobacter	Achromobacter	GWHDOPA00000000
AL008	112	234533	4202258	73743	4722	3947	1842	Proteobacteria	Gammaproteobacteria	Pseudomonadales	Marinomonadaceae	Marinomonas	Marinomonas	GWHDOPB00000000
AL009	73	596703	3687560	125477	5849	3554	1715	Proteobacteria	Alphaproteobacteria	Rhodobacterales	Rhodobacteraceae	Celeribacter	--	GWHDOPC00000000
AL010	58	593065	2843733	271248	4309	2717	1490	Proteobacteria	Gammaproteobacteria	Methylococcales	Cycloclasticaceae	Cycloclasticus	Cycloclasticus	GWHDOPD00000000
AL011	104	163777	3264409	57753	5575	3115	1608	Proteobacteria	Gammaproteobacteria	Pseudomonadales	Nitrincolaceae	Marinobacterium	Marinobacterium	GWHDOPE00000000
AL012	103	365746	5918571	140296	5844	5183	2230	Proteobacteria	Gammaproteobacteria	Pseudomonadales	Nitrincolaceae	Marinobacterium_A	Marinobacterium_A	GWHDOPF00000000
AL013	49	842925	4891683	186451	4491	4356	2142	Proteobacteria	Gammaproteobacteria	Enterobacterales	Vibrionaceae	Vibrio	Vibrio	GWHDOPG00000000
AL014	20	562023	4384917	260567	5489	3968	1732	Proteobacteria	Alphaproteobacteria	Rhodospirillales	Thalassospiraceae	Thalassospira	Thalassospira	GWHDOPH00000000
AL015	97	241090	4724044	97334	6001	4484	1843	Proteobacteria	Alphaproteobacteria	Rhizobiales	Rhizobiaceae	Hoeflea	--	GWHDOPI00000000
AL016	67	278240	4142395	147215	5952	4069	1740	Proteobacteria	Alphaproteobacteria	Rhodobacterales	Rhodobacteraceae	Celeribacter	--	GWHDOPJ00000000
AL017	30	455340	3067377	239748	4899	2799	1589	Proteobacteria	Gammaproteobacteria	Pseudomonadales	Pseudomonadaceae	Pseudomonas_C	--	GWHDOPK00000000
AL018	51	223977	3003633	93608	5659	2723	1350	Proteobacteria	Alphaproteobacteria	Sphingomonadales	Emcibacteraceae	--	--	GWHDOPL00000000
AL019	35	475214	3723789	176375	5581	3474	2038	Proteobacteria	Gammaproteobacteria	Enterobacterales	Aeromonadaceae	Oceanimonas	Oceanimonas	GWHDOPM00000000
AL020	128	374649	4673477	68840	5404	4223	1891	Proteobacteria	Gammaproteobacteria	Pseudomonadales	Oleiphilaceae	Marinobacter	--	GWHDOPN00000000
AL021	77	261330	3573598	156738	4405	3472	1617	Proteobacteria	Gammaproteobacteria	Nitrosococcales	Methylophagaceae	Methylophaga	Methylophaga	GWHDOPO00000000
AL022	96	838289	4521502	133208	5544	4337	1761	Proteobacteria	Alphaproteobacteria	Rhodobacterales	Rhodobacteraceae	Celeribacter	--	GWHDOPP00000000
AL023	45	701773	4179762	404082	3862	3579	1255	Bacteroidota	Bacteroidia	Flavobacteriales	Flavobacteriaceae	Galbibacter	--	GWHDOPQ00000000
AL024	47	380009	3057830	123463	6693	2807	1259	Actinobacteriota	Actinomycetia	Mycobacteriales	Mycobacteriaceae	Corynebacterium	Corynebacterium	GWHDOPR00000000
AL025	66	473276	3653109	104641	5703	3532	1646	Proteobacteria	Alphaproteobacteria	Rhodobacterales	Rhodobacteraceae	Celeribacter	--	GWHDOPS00000000
AL026	65	237379	4365593	129012	4185	3839	1144	Bacteroidota	Bacteroidia	Flavobacteriales	Schleiferiaceae	Owenweeksia	--	GWHDOPT00000000
AL027	134	183198	6119683	70829	5911	5586	2022	Proteobacteria	Alphaproteobacteria	Rhizobiales	Stappiaceae	Roseibium	Roseibium	GWHDOPU00000000
AL028	107	191665	4497882	65020	6256	4078	2043	Proteobacteria	Gammaproteobacteria	Pseudomonadales	Pseudomonadaceae	Pseudomonas_A	Pseudomonas_A	GWHDOPV00000000
AL029	65	640268	7631029	296435	5120	6057	1336	Planctomycetota	Planctomycetes	Planctomycetales	Planctomycetaceae	Gimesia	Gimesia	GWHDOPW00000000
AL030	29	457828	4435533	229225	6623	3931	1809	Proteobacteria	Alphaproteobacteria	Rhizobiales	Stappiaceae	Stappia	--	GWHDOPX00000000
AL031	27	603367	3371401	243411	6406	3347	1587	Proteobacteria	Alphaproteobacteria	Rhodobacterales	Rhodobacteraceae	Maritimibacter	--	GWHDOPY00000000
AL032	88	433241	3958593	100455	3574	3526	1049	Bacteroidota	Bacteroidia	Flavobacteriales	Crocinitomicaceae	Brumimicrobium	--	GWHDOPZ00000000
AL033	61	568342	2972892	174796	4940	2783	1432	Proteobacteria	Gammaproteobacteria	Enterobacterales	Alteromonadaceae	Pseudidiomarina	Pseudidiomarina	GWHDOQA00000000
AL034	111	209848	3720397	67400	5563	3442	1748	Proteobacteria	Gammaproteobacteria	Pseudomonadales	Nitrincolaceae	Marinobacterium	Marinobacterium	GWHDOQB00000000
AL035	78	271802	6456901	132859	5020	4984	1233	Planctomycetota	Planctomycetes	Planctomycetales	Planctomycetaceae	KOR42	--	GWHDOQC00000000
AL036	91	252786	4715803	87022	3908	4179	1721	Proteobacteria	Gammaproteobacteria	Enterobacterales	Alteromonadaceae	Thalassotalea_C	Thalassotalea_C	GWHDOQD00000000
AL037	32	699638	6935248	306671	5089	5294	1275	Planctomycetota	Planctomycetes	Planctomycetales	Planctomycetaceae	Gimesia	--	GWHDOQE00000000
AL038	23	469393	3884437	301572	4364	3470	1747	Proteobacteria	Gammaproteobacteria	Enterobacterales	Alteromonadaceae	Neptunicella	--	GWHDOQF00000000
AL039	251	132163	4398500	32797	4077	3811	1571	Proteobacteria	Gammaproteobacteria	Pseudomonadales	Oleiphilaceae	PZPK01	--	GWHDOQG00000000
AL040	165	53168	2633471	18645	3916	2337	885	Bacteroidota	Bacteroidia	Chitinophagales	Chitinophagaceae	Edaphocola	--	GWHDOQH00000000
AL041	49	733112	4283009	336819	5032	4053	1634	Proteobacteria	Alphaproteobacteria	Rhodospirillales	Terasakiellaceae	Terasakiella	Terasakiella	GWHDOQI00000000
AL042	19	499242	2468755	323608	5230	2347	1299	Proteobacteria	Gammaproteobacteria	Pseudomonadales	Moraxellaceae	Paraperlucidibaca	--	GWHDOQJ00000000
AL043	193	73208	3528413	26156	5704	3243	1504	Proteobacteria	Gammaproteobacteria	Pseudomonadales	Spongiibacteraceae	Spongiibacter	Spongiibacter	GWHDOQK00000000
AL044	29	507945	3183014	164148	6394	2999	1383	Proteobacteria	Alphaproteobacteria	Caulobacterales	Maricaulaceae	Maricaulis	--	GWHDOQL00000000
AL045	28	603020	4129882	259810	6512	3769	1639	Proteobacteria	Alphaproteobacteria	Minwuiales	Minwuiaceae	--	--	GWHDOQM00000000
AL046	5	1222106	2699816	444099	4692	2548	1479	Proteobacteria	Gammaproteobacteria	Enterobacterales	Alteromonadaceae	Idiomarina	Idiomarina	GWHDOQN00000000
AL047	29	430397	3119558	219405	3260	2848	1085	Bacteroidota	Bacteroidia	Flavobacteriales	Flavobacteriaceae	Mangrovimonas	--	GWHDOQO00000000
AL048	59	604614	3658195	138390	5863	3568	1674	Proteobacteria	Alphaproteobacteria	Rhodobacterales	Rhodobacteraceae	Celeribacter	--	GWHDOQP00000000
AL049	45	511217	3667428	143646	4581	3401	1763	Proteobacteria	Gammaproteobacteria	Pseudomonadales	Marinomonadaceae	Marinomonas	Marinomonas	GWHDOQQ00000000
AL050	56	461497	3406100	102542	5560	3041	1426	Proteobacteria	Alphaproteobacteria	Sphingomonadales	Emcibacteraceae	--	--	GWHDOQR00000000
AL051	28	545998	3875176	297335	6134	3685	1735	Proteobacteria	Alphaproteobacteria	Rhodobacterales	Rhodobacteraceae	--	--	GWHDOQS00000000
AL052	136	135346	3593410	36311	4298	3051	1497	Proteobacteria	Gammaproteobacteria	Pseudomonadales	Moraxellaceae	Psychrobacter	Psychrobacter	GWHDOQT00000000
AL053	38	970280	3950001	181349	6036	3538	1748	Proteobacteria	Gammaproteobacteria	Pseudomonadales	Oleiphilaceae	Marinobacter	Marinobacter	GWHDOQU00000000
AL054	36	447796	3139374	189463	4375	2979	1558	Proteobacteria	Gammaproteobacteria	Nitrosococcales	Methylophagaceae	Methylophaga	Methylophaga	GWHDOQV00000000
AL055	53	359189	4346350	148576	3692	3809	1202	Bacteroidota	Bacteroidia	Cytophagales	Cyclobacteriaceae	Fulvivirga	--	GWHDOQW00000000
AL056	149	115088	2981055	27606	3928	2812	926	Bacteroidota	Bacteroidia	Flavobacteriales	Flavobacteriaceae	Aequorivita	Aequorivita	GWHDOQX00000000
AL057	169	146001	4352694	36668	5996	4116	1769	Proteobacteria	Alphaproteobacteria	Rhizobiales	Rhizobiaceae	Hoeflea	--	GWHDOQY00000000
AL058	128	172223	3046158	34296	6390	2923	1316	Proteobacteria	Alphaproteobacteria	Caulobacterales	Maricaulaceae	Maricaulis	--	GWHDOQZ00000000
AL059	124	138062	3755940	38197	6068	3372	1744	Proteobacteria	Gammaproteobacteria	Pseudomonadales	Oleiphilaceae	Marinobacter	Marinobacter	GWHDORA00000000
AL060	54	696385	4690767	211507	5894	4490	1867	Proteobacteria	Alphaproteobacteria	Rhodobacterales	Rhodobacteraceae	Epibacterium	Epibacterium	GWHDORB00000000
AL061	35	553077	4068489	221190	3888	3727	1087	Bdellovibrionota	Bacteriovoracia	Bacteriovoracales	Bacteriovoracaceae	GCA-2712005	--	GWHDORC00000000
AL062	96	120447	2537809	39122	4843	2326	1383	Proteobacteria	Gammaproteobacteria	Enterobacterales	Alteromonadaceae	Pseudidiomarina	Pseudidiomarina	GWHDORD00000000
AL063	87	186428	3334639	64010	4375	2975	1613	Proteobacteria	Gammaproteobacteria	Enterobacterales	Alteromonadaceae	Neptunicella	--	GWHDORE00000000
AL064	255	58316	3562067	17319	5683	3169	1114	Verrucomicrobiota	Verrucomicrobiae	Opitutales	Opitutaceae	Cephaloticoccus	--	GWHDORF00000000
AL065	66	149061	2485808	74613	5229	2393	1287	Proteobacteria	Gammaproteobacteria	Pseudomonadales	Porticoccaceae	Porticoccus	--	GWHDORG00000000
AL066	218	66448	3733681	21140	5297	3430	1581	Proteobacteria	Gammaproteobacteria	Pseudomonadales	Saccharospirillaceae	UBA2009	UBA2009	GWHDORH00000000
AL067	45	642951	3965611	321164	4788	3659	1517	Proteobacteria	Alphaproteobacteria	Rhodospirillales	Terasakiellaceae	Terasakiella	--	GWHDORI00000000
AL068	114	757448	5259237	228831	5864	4966	1699	Proteobacteria	Alphaproteobacteria	Sphingomonadales	Kordiimonadaceae	Kordiimonas	--	GWHDORJ00000000
AL069	71	435715	4367032	105523	6752	4067	1774	Proteobacteria	Alphaproteobacteria	Rhodobacterales	Rhodobacteraceae	AWRV01	--	GWHDORK00000000
AL070	65	404671	4452027	127637	5086	4049	1884	Proteobacteria	Gammaproteobacteria	Pseudomonadales	Nitrincolaceae	Amphritea	--	GWHDORL00000000
AL071	177	205254	7619621	61415	5807	5659	1367	Planctomycetota	Planctomycetes	Pirellulales	Pirellulaceae	Poly24	Poly24	GWHDORM00000000
AL072	24	687103	3840374	331866	3273	3402	1170	Bacteroidota	Bacteroidia	Flavobacteriales	Flavobacteriaceae	Winogradskyella	--	GWHDORN00000000
AL073	65	132197	2274344	56035	4288	2098	884	Bacteroidota	Bacteroidia	Flavobacteriales	Flavobacteriaceae	Aequorivita	--	GWHDORO00000000
AL074	7	1375104	3409457	892275	3666	3281	1176	Bdellovibrionota	Bacteriovoracia	Bacteriovoracales	Bacteriovoracaceae	Halobacteriovorax	Halobacteriovorax	GWHDORP00000000
AL075	54	256854	3315177	117905	3293	2819	859	Bacteroidota	Kapabacteria	Kapabacteriales	UBA2268	PGYR01	--	GWHDORQ00000000
AL076	36	621954	4097883	435013	4013	3597	1155	Bacteroidota	Bacteroidia	Flavobacteriales	Schleiferiaceae	Owenweeksia	Owenweeksia	GWHDORR00000000
AL077	48	685193	7237472	256405	5327	5551	1337	Planctomycetota	Planctomycetes	Planctomycetales	Planctomycetaceae	Gimesia	Gimesia	GWHDORS00000000
AL078	45	326234	3536514	150402	4579	3305	1598	Proteobacteria	Gammaproteobacteria	Pseudomonadales	Nitrincolaceae	Neptuniibacter	Neptuniibacter	GWHDORT00000000
AL079	136	457744	4754734	132989	3965	4127	1685	Proteobacteria	Gammaproteobacteria	Pseudomonadales	Oleiphilaceae	PZPK01	--	GWHDORU00000000
AL080	39	394455	3773808	137237	4374	3348	1702	Proteobacteria	Gammaproteobacteria	Enterobacterales	Alteromonadaceae	Neptunicella	--	GWHDORV00000000
AL081	165	437962	8396033	147445	5019	6654	1458	Planctomycetota	Planctomycetes	Planctomycetales	Planctomycetaceae	Gimesia	Gimesia	GWHDORW00000000
AL082	22	660490	3580080	302073	5915	3501	1582	Proteobacteria	Alphaproteobacteria	Rhodobacterales	Rhodobacteraceae	--	--	GWHDORX00000000
AL083	64	408081	4298017	102608	6002	4076	1797	Proteobacteria	Alphaproteobacteria	Rhizobiales	Rhizobiaceae	Hoeflea	--	GWHDORY00000000
AL084	117	195872	3828946	64210	6537	3627	1887	Proteobacteria	Gammaproteobacteria	Pseudomonadales	Pseudomonadaceae	Pseudomonas_A	Pseudomonas_A	GWHDORZ00000000
AL085	53	338267	3822239	200717	3415	3592	985	Bdellovibrionota	Bacteriovoracia	Bacteriovoracales	Bacteriovoracaceae	GCA-2706205	--	GWHDOSA00000000
AL086	95	505804	4683417	80274	6207	4445	1826	Proteobacteria	Alphaproteobacteria	Rhizobiales	Rhizobiaceae	Nitratireductor	Nitratireductor	GWHDOSB00000000
AL087	49	802104	5252326	236515	5511	4749	1883	Proteobacteria	Gammaproteobacteria	Burkholderiales	Burkholderiaceae	Pusillimonas_B	Pusillimonas_B	GWHDOSC00000000
AL088	94	152234	3063751	47605	4356	2544	1438	Proteobacteria	Gammaproteobacteria	Pseudomonadales	Moraxellaceae	Psychrobacter	Psychrobacter	GWHDOSD00000000
AL089	20	519694	4434696	372790	5327	3986	1769	Proteobacteria	Alphaproteobacteria	Rhodospirillales	Thalassospiraceae	Thalassospira	Thalassospira	GWHDOSE00000000
AL090	148	162710	5371820	51633	6179	4893	2237	Proteobacteria	Gammaproteobacteria	Pseudomonadales	Pseudomonadaceae	Pseudomonas_E	Pseudomonas_E	GWHDOSF00000000
AL091	44	411681	3030153	97907	6738	2773	1262	Actinobacteriota	Actinomycetia	Mycobacteriales	Mycobacteriaceae	Corynebacterium	Corynebacterium	GWHDOSG00000000
AL092	103	266803	3651986	61870	6600	3409	1321	Actinobacteriota	Actinomycetia	Actinomycetales	Microbacteriaceae	Microbacterium	--	GWHDOSH00000000
AL093	89	266805	3736155	69039	6712	3479	1392	Actinobacteriota	Actinomycetia	Actinomycetales	Micrococcaceae	Arthrobacter_H	--	GWHDOSI00000000
AL094	60	550186	4748539	189719	6123	4473	1896	Proteobacteria	Alphaproteobacteria	Rhodobacterales	Rhodobacteraceae	Epibacterium	--	GWHDOSJ00000000
AL095	27	330592	2260664	157629	4834	2108	1306	Proteobacteria	Gammaproteobacteria	Enterobacterales	Alteromonadaceae	Pseudidiomarina	--	GWHDOSK00000000
AL096	200	125852	3830708	25688	6215	3708	1433	Proteobacteria	Alphaproteobacteria	Caulobacterales	Hyphomonadaceae	Henriciella	--	GWHDOSL00000000
AL097	110	211853	5207422	73068	4015	4561	1245	Bacteroidota	Bacteroidia	Cytophagales	Cyclobacteriaceae	Algoriphagus	--	GWHDOSM00000000
AL098	71	637806	8326551	295077	5282	6623	1404	Planctomycetota	Planctomycetes	Planctomycetales	Planctomycetaceae	Gimesia	Gimesia	GWHDOSN00000000
AL099	110	147669	3306313	49384	6376	3117	1387	Proteobacteria	Alphaproteobacteria	Caulobacterales	Maricaulaceae	Maricaulis	--	GWHDOSO00000000
AL100	108	714764	5272665	253609	5385	4848	1641	Proteobacteria	Alphaproteobacteria	Sphingomonadales	Kordiimonadaceae	Kordiimonas	--	GWHDOSP00000000
AL101	122	152805	2794340	34868	5064	2511	1301	Proteobacteria	Gammaproteobacteria	Enterobacterales	Alteromonadaceae	Pseudidiomarina	--	GWHDOSQ00000000
AL102	105	108146	2580077	33601	4814	2422	1330	Proteobacteria	Gammaproteobacteria	Enterobacterales	Alteromonadaceae	Pseudidiomarina	Pseudidiomarina	GWHDOSR00000000
AL103	39	718839	4390202	188297	4249	3772	1271	Bacteroidota	Bacteroidia	Flavobacteriales	Flavobacteriaceae	Sediminicola	--	GWHDOSS00000000
AL104	23	382285	3223714	227321	5811	3150	1635	Proteobacteria	Gammaproteobacteria	Burkholderiales	Burkholderiaceae	Castellaniella	--	GWHDOST00000000
AL105	71	239913	4093662	117801	3797	3510	1214	Bacteroidota	Bacteroidia	Flavobacteriales	Flavobacteriaceae	Galbibacter	--	GWHDOSU00000000
AL106	51	303398	4528237	140645	4928	4031	1928	Proteobacteria	Gammaproteobacteria	Enterobacterales	Shewanellaceae	Shewanella	--	GWHDOSV00000000
AL107	18	718823	3197824	305063	6802	3088	1295	Actinobacteriota	Actinomycetia	Actinomycetales	Microbacteriaceae	Microbacterium	--	GWHDOSW00000000
AL108	27	414991	3009023	177685	6754	2771	1271	Actinobacteriota	Actinomycetia	Mycobacteriales	Mycobacteriaceae	Corynebacterium	Corynebacterium	GWHDOSX00000000
AL109	45	528339	4002167	180858	6733	3756	1428	Actinobacteriota	Actinomycetia	Actinomycetales	Micrococcaceae	Arthrobacter_H	--	GWHDOSY00000000
AL110	116	514165	5639777	137000	4468	5107	2327	Proteobacteria	Gammaproteobacteria	Enterobacterales	Vibrionaceae	Vibrio	--	GWHDOSZ00000000
AL111	13	555733	2793309	384490	5923	2652	1519	Proteobacteria	Gammaproteobacteria	Burkholderiales	Burkholderiaceae	Castellaniella	--	GWHDOTA00000000
AL112	80	197913	4529655	96660	4844	3984	1875	Proteobacteria	Gammaproteobacteria	Pseudomonadales	Nitrincolaceae	Amphritea	--	GWHDOTB00000000
AL113	34	196824	3183670	147399	6400	2985	1402	Proteobacteria	Alphaproteobacteria	Caulobacterales	Maricaulaceae	Maricaulis	--	GWHDOTC00000000
AL114	182	85402	2678988	17331	3344	2385	980	Bacteroidota	Bacteroidia	Flavobacteriales	Flavobacteriaceae	Mangrovimonas	--	GWHDOTD00000000
AL115	70	988063	6669353	201153	5021	5133	1251	Planctomycetota	Planctomycetes	Planctomycetales	Planctomycetaceae	KOR42	--	GWHDOTE00000000
AL116	52	468083	4553453	214658	5881	4302	1859	Proteobacteria	Alphaproteobacteria	Rhodobacterales	Rhodobacteraceae	Epibacterium	Epibacterium	GWHDOTF00000000
AL117	42	225498	2985449	122972	6654	2747	1661	Proteobacteria	Gammaproteobacteria	Burkholderiales	Burkholderiaceae	Castellaniella	--	GWHDOTG00000000
AL118	34	568377	4129799	180323	5856	3784	1828	Proteobacteria	Gammaproteobacteria	Enterobacterales	Gallaecimonadaceae	Gallaecimonas	Gallaecimonas	GWHDOTH00000000
AL119	81	293224	4570406	88068	5343	4049	1960	Proteobacteria	Gammaproteobacteria	Enterobacterales	Shewanellaceae	Shewanella	Shewanella	GWHDOTI00000000
AL120	29	503516	3153693	245807	4823	2951	1644	Proteobacteria	Gammaproteobacteria	Pseudomonadales	Pseudomonadaceae	Pseudomonas_C	Pseudomonas_C	GWHDOTJ00000000
AL121	87	478822	7288089	179582	5117	5718	1380	Planctomycetota	Planctomycetes	Planctomycetales	Planctomycetaceae	Gimesia	Gimesia	GWHDOTK00000000
AL122	48	381360	4115843	157649	5415	3745	1997	Proteobacteria	Gammaproteobacteria	Pseudomonadales	Halomonadaceae	Halomonas	--	GWHDOTL00000000
AL123	18	1349932	3835139	303674	3325	3284	1199	Bacteroidota	Bacteroidia	Flavobacteriales	Flavobacteriaceae	Joostella	--	GWHDOTM00000000
AL124	70	179058	3801524	81364	6755	3576	1411	Actinobacteriota	Actinomycetia	Actinomycetales	Micrococcaceae	Arthrobacter_H	--	GWHDOTN00000000
AL125	20	903045	3468437	338602	5869	3323	1629	Proteobacteria	Alphaproteobacteria	Rhodobacterales	Rhodobacteraceae	Celeribacter	Celeribacter	GWHDOTO00000000
AL126	108	169343	3067524	53226	4093	2834	1037	Bacteroidota	Bacteroidia	Flavobacteriales	Flavobacteriaceae	Aequorivita	Aequorivita	GWHDOTP00000000
AA001	21	1409670	4611157	452277	61.1	4289	1859	Proteobacteria	Alphaproteobacteria	Rhizobiales	Rhizobiaceae	Hoeflea	--	GWHDOTQ00000000
AA002	160	88929	2486561	22927	29.42	2463	1088	Campylobacterota	Campylobacteria	Campylobacterales	Arcobacteraceae	Halarcobacter	Halarcobacter	GWHDOTR00000000
AA003	34	595148	3819240	255340	47.9	3558	1525	Proteobacteria	Alphaproteobacteria	Rhodospirillales	Terasakiellaceae	Terasakiella	--	GWHDOTS00000000
AA004	165	200977	4770694	50472	37.43	4161	1243	Bacteroidota	Bacteroidia	Flavobacteriales	Flavobacteriaceae	Gelidibacter	Gelidibacter	GWHDOTT00000000
AA005	116	159388	3193167	40615	53.73	2935	1642	Proteobacteria	Gammaproteobacteria	Pseudomonadales	Oleiphilaceae	Marinobacter	Marinobacter	GWHDOTU00000000
AA006	28	403184	3841130	246859	44.71	3594	1199	Bacteroidota	Bacteroidia	Flavobacteriales	Flavobacteriaceae	Muricauda	--	GWHDOTV00000000
AA007	26	1013425	3981917	673433	54.4	3670	1463	Proteobacteria	Alphaproteobacteria	Sphingomonadales	Kordiimonadaceae	Kordiimonas	--	GWHDOTW00000000
AA008	13	1583369	2731429	1583369	50.2	2513	1409	Proteobacteria	Gammaproteobacteria	Enterobacterales	Alteromonadaceae	Pseudidiomarina	--	GWHDOTX00000000
AA009	68	623800	4254154	145627	49.94	3766	1714	Proteobacteria	Gammaproteobacteria	Pseudomonadales	Halomonadaceae	Oceanospirillum	--	GWHDOTY00000000
AA010	112	270744	4242024	73799	68.15	4149	1739	Proteobacteria	Alphaproteobacteria	Rhodobacterales	Rhodobacteraceae	Pararhodobacter	Pararhodobacter	GWHDOTZ00000000
AA011	78	509404	4749986	242219	59.6	4554	1861	Proteobacteria	Alphaproteobacteria	Rhodobacterales	Rhodobacteraceae	Celeribacter	--	GWHDOUA00000000
AA012	66	146494	2369759	55793	42.73	2378	1075	Campylobacterota	Campylobacteria	Campylobacterales	Sulfurimonadaceae	GCA-2733885	--	GWHDOUB00000000
AA013	92	156031	3181143	54281	58.75	2919	1474	Proteobacteria	Gammaproteobacteria	Pseudomonadales	Alcanivoracaceae	Alcanivorax	--	GWHDOUC00000000
AA014	56	356862	3097571	103763	63.34	2929	1359	Proteobacteria	Alphaproteobacteria	Caulobacterales	Maricaulaceae	Maricaulis	--	GWHDOUD00000000
AA015	36	517647	4382521	284409	59.48	4076	1751	Proteobacteria	Alphaproteobacteria	Rhodobacterales	Rhodobacteraceae	Pseudophaeobacter	Pseudophaeobacter	GWHDOUE00000000
AA016	26	870945	4498617	412895	60.17	4224	1886	Proteobacteria	Gammaproteobacteria	Burkholderiales	Burkholderiaceae	Pusillimonas_B	--	GWHDOUF00000000
AA017	74	149024	2738026	55604	31.23	2500	983	Bacteroidota	Bacteroidia	Flavobacteriales	Flavobacteriaceae	Mesoflavibacter	Mesoflavibacter	GWHDOUG00000000
AA018	12	1074465	4065343	545351	45.15	3775	1627	Proteobacteria	Alphaproteobacteria	Kiloniellales	Kiloniellaceae	Kiloniella	--	GWHDOUH00000000
AA019	81	159922	2777600	59416	41.02	2608	975	Bacteroidota	Bacteroidia	Flavobacteriales	Flavobacteriaceae	Aequorivita	Aequorivita	GWHDOUI00000000
AA020	174	528343	5250763	177692	45.41	4602	1804	Proteobacteria	Gammaproteobacteria	Pseudomonadales	Halomonadaceae	Oceanospirillum	--	GWHDOUJ00000000
AA021	53	593984	6694365	213468	50.25	5299	1269	Planctomycetota	Planctomycetes	Planctomycetales	Planctomycetaceae	KOR42	--	GWHDOUK00000000
AA022	43	381406	2981219	106037	62.79	2840	1365	Proteobacteria	Alphaproteobacteria	Caulobacterales	Maricaulaceae	Maricaulis	--	GWHDOUL00000000
AA023	31	884961	2988525	158700	35.3	2731	1055	Bacteroidota	Bacteroidia	Flavobacteriales	Flavobacteriaceae	Xanthomarina	Xanthomarina	GWHDOUM00000000
AA024	69	649492	6824483	207581	50.15	5307	1261	Planctomycetota	Planctomycetes	Planctomycetales	Planctomycetaceae	KOR42	--	GWHDOUN00000000
AA025	16	616040	3612571	403755	32.78	3118	1136	Bacteroidota	Bacteroidia	Flavobacteriales	Flavobacteriaceae	Winogradskyella	--	GWHDOUO00000000
AA026	27	462230	3946053	226394	3764	3662	1142	Bacteroidota	Bacteroidia	Flavobacteriales	Flavobacteriaceae	Flavobacterium	Flavobacterium	GWHDOUP00000000
AA027	35	294537	3336956	159115	5679	3235	1425	Proteobacteria	Alphaproteobacteria	Sphingomonadales	Sphingomonadaceae	Parasphingorhabdus	--	GWHDOUQ00000000
AA028	126	112504	2606004	29618	3445	2366	980	Bacteroidota	Bacteroidia	Flavobacteriales	Flavobacteriaceae	Polaribacter_A	Polaribacter_A	GWHDOUR00000000
AA029	82	170782	3068271	66098	40.64	2859	977	Bacteroidota	Bacteroidia	Flavobacteriales	Flavobacteriaceae	Aequorivita	Aequorivita	GWHDOUS00000000
AA030	77	419630	3635141	190499	3497	3292	1094	Bacteroidota	Bacteroidia	Flavobacteriales	Flavobacteriaceae	Bizionia	Bizionia	GWHDOUT00000000
AA031	34	1081749	4735565	534569	5886	4482	1876	Proteobacteria	Alphaproteobacteria	Rhodobacterales	Rhodobacteraceae	Epibacterium	Epibacterium	GWHDOUU00000000
AA032	38	560081	4669965	280026	6209	4431	1852	Proteobacteria	Alphaproteobacteria	Rhizobiales	Rhizobiaceae	Nitratireductor	Nitratireductor	GWHDOUV00000000
AA033	52	464622	5312290	187217	6303	4856	2213	Proteobacteria	Gammaproteobacteria	Pseudomonadales	Pseudomonadaceae	Pseudomonas_E	Pseudomonas_E	GWHDOUW00000000
AA034	139	106772	3500835	34491	6108	3344	1607	Proteobacteria	Alphaproteobacteria	Rhodobacterales	Rhodobacteraceae	--	--	GWHDOUX00000000
AA035	32	774411	3565798	251270	5716	3414	1398	Proteobacteria	Alphaproteobacteria	Sphingomonadales	Sphingomonadaceae	Parasphingorhabdus	--	GWHDOUY00000000
AA036	18	1046015	3222626	735807	5605	3046	1360	Proteobacteria	Alphaproteobacteria	Sphingomonadales	Sphingomonadaceae	Parasphingorhabdus	--	GWHDOUZ00000000
AA037	136	311570	4606674	122902	3331	4156	1242	Bacteroidota	Bacteroidia	Flavobacteriales	Flavobacteriaceae	Tenacibaculum	--	GWHDOVA00000000
AA038	29	480248	3652204	264258	5715	3425	1441	Proteobacteria	Alphaproteobacteria	Sphingomonadales	Sphingomonadaceae	Parasphingorhabdus	--	GWHDOVB00000000
AA039	43	923828	4959383	309058	4254	4473	2032	Proteobacteria	Gammaproteobacteria	Pseudomonadales	Marinomonadaceae	Marinomonas	Marinomonas	GWHDOVC00000000
AA040	43	664962	4283975	247257	6071	3965	2033	Proteobacteria	Gammaproteobacteria	Pseudomonadales	Pseudomonadaceae	Pseudomonas_A	Pseudomonas_A	GWHDOVD00000000
AA041	20	560481	3031005	259632	5426	2898	1582	Proteobacteria	Gammaproteobacteria	Burkholderiales	Burkholderiaceae	Pusillimonas_A	Pusillimonas_A	GWHDOVE00000000
AA042	52	392490	4861423	256675	6181	4603	1872	Proteobacteria	Alphaproteobacteria	Rhizobiales	Rhizobiaceae	Nitratireductor	Nitratireductor	GWHDOVF00000000
AA043	31	236891	2198466	161097	4715	2061	1272	Proteobacteria	Gammaproteobacteria	Enterobacterales	Alteromonadaceae	Pseudidiomarina	--	GWHDOVG00000000
AA044	55	527997	4496208	218735	6717	4227	1843	Proteobacteria	Alphaproteobacteria	Rhodobacterales	Rhodobacteraceae	Salipiger	--	GWHDOVH00000000
AA045	40	407666	4114768	216450	4950	3796	1757	Proteobacteria	Gammaproteobacteria	Enterobacterales	Alteromonadaceae	Rheinheimera	Rheinheimera	GWHDOVI00000000
AA046	88	284483	3981152	76499	5952	3560	1776	Proteobacteria	Gammaproteobacteria	Pseudomonadales	Oleiphilaceae	Marinobacter	Marinobacter	GWHDOVJ00000000
AA047	89	286833	3769897	83099	5574	3385	1899	Proteobacteria	Gammaproteobacteria	Enterobacterales	Aeromonadaceae	Oceanisphaera	--	GWHDOVK00000000
AA048	30	500235	4031739	197708	6155	3689	1822	Proteobacteria	Gammaproteobacteria	Pseudomonadales	Pseudomonadaceae	Pseudomonas_D	Pseudomonas_D	GWHDOVL00000000
AA049	49	349234	4146611	164996	4559	3761	1202	Bacteroidota	Bacteroidia	Flavobacteriales	Flavobacteriaceae	Muricauda	Muricauda	GWHDOVM00000000
AA050	79	725279	3947769	421237	5255	3766	1385	Proteobacteria	Alphaproteobacteria	Caulobacterales	Maricaulaceae	--	--	GWHDOVN00000000
AA051	183	88554	3469691	25262	3340	3102	1044	Bacteroidota	Bacteroidia	Flavobacteriales	Flavobacteriaceae	Winogradskyella	--	GWHDOVO00000000
AA052	79	310416	4081013	118948	3891	3819	1644	Proteobacteria	Gammaproteobacteria	Pseudomonadales	Moraxellaceae	Acinetobacter	Acinetobacter	GWHDOVP00000000
AA053	63	383421	5136549	116676	6687	4747	1871	Proteobacteria	Alphaproteobacteria	Kiloniellales	Kiloniellaceae	WHTV01	--	GWHDOVQ00000000
AA054	40	447783	3583809	216551	6564	3492	1611	Proteobacteria	Alphaproteobacteria	Rhodobacterales	Rhodobacteraceae	Maritimibacter_A	--	GWHDOVR00000000
AA055	22	602708	4227411	359562	4166	3717	1114	Bacteroidota	Bacteroidia	Flavobacteriales	Schleiferiaceae	Owenweeksia	--	GWHDOVS00000000
AA056	86	412473	4103986	115536	4655	3832	1529	Proteobacteria	Alphaproteobacteria	Rhodospirillales	Terasakiellaceae	Terasakiella	--	GWHDOVT00000000
AA057	17	1489599	2750750	1489599	5008	2533	1416	Proteobacteria	Gammaproteobacteria	Enterobacterales	Alteromonadaceae	Pseudidiomarina	--	GWHDOVU00000000
AA058	23	478895	2895557	215379	4267	2683	1045	Bacteroidota	Bacteroidia	Flavobacteriales	Flavobacteriaceae	Aequorivita	--	GWHDOVV00000000
AA059	122	144070	3701814	49206	5923	3618	1597	Proteobacteria	Alphaproteobacteria	Rhodobacterales	Rhodobacteraceae	--	--	GWHDOVW00000000
AA060	42	1258561	5086476	412084	5883	4877	1910	Proteobacteria	Alphaproteobacteria	Rhodobacterales	Rhodobacteraceae	Epibacterium	Epibacterium	GWHDOVX00000000
AA061	88	354895	4676130	114075	5229	4215	2022	Proteobacteria	Gammaproteobacteria	Enterobacterales	Shewanellaceae	Shewanella	Shewanella	GWHDOVY00000000
AA062	50	504248	5725126	241229	5522	4774	1156	Myxococcota	Bradymonadia	Bradymonadales	Bradymonadaceae	V1718	V1718	GWHDOVZ00000000
AA063	125	216945	3835466	53172	3613	3287	1174	Bacteroidota	Bacteroidia	Flavobacteriales	Flavobacteriaceae	Flaviramulus_A	--	GWHDOWA00000000
AA064	104	128261	2794511	44238	3532	2558	980	Bacteroidota	Bacteroidia	Flavobacteriales	Flavobacteriaceae	Xanthomarina	Xanthomarina	GWHDOWB00000000
AA065	52	449568	3419429	138235	3604	3071	1007	Bacteroidota	Bacteroidia	Flavobacteriales	Flavobacteriaceae	Aequorivita	Aequorivita	GWHDOWC00000000
AA066	49	681491	4076485	185613	6038	3859	1751	Proteobacteria	Alphaproteobacteria	Rhodobacterales	Rhodobacteraceae	Primorskyibacter	Primorskyibacter	GWHDOWD00000000
AA067	49	484579	7391561	274228	5813	5434	1351	Planctomycetota	Planctomycetes	Pirellulales	Pirellulaceae	Poly24	Poly24	GWHDOWE00000000
AA068	44	349453	3165051	91590	6319	3007	1380	Proteobacteria	Alphaproteobacteria	Caulobacterales	Maricaulaceae	Maricaulis	--	GWHDOWF00000000
AA069	48	625871	4503714	204141	5896	4277	1827	Proteobacteria	Alphaproteobacteria	Rhodobacterales	Rhodobacteraceae	Epibacterium	Epibacterium	GWHDOWG00000000
AA070	54	681938	3495258	156694	3658	3044	1077	Bacteroidota	Bacteroidia	Flavobacteriales	Flavobacteriaceae	Aequorivita	Aequorivita	GWHDOWH00000000
AA071	10	897695	2659384	544572	4472	2450	1374	Proteobacteria	Gammaproteobacteria	Enterobacterales	Kangiellaceae	Kangiella	--	GWHDOWI00000000
AA072	75	380300	4376626	110140	6112	4094	1803	Proteobacteria	Alphaproteobacteria	Rhodobacterales	Rhodobacteraceae	Epibacterium	Epibacterium	GWHDOWJ00000000
AA073	25	734513	4459414	248232	6227	4230	1823	Proteobacteria	Alphaproteobacteria	Rhizobiales	Rhizobiaceae	Nitratireductor	Nitratireductor	GWHDOWK00000000
AA074	26	368268	3868132	223883	5054	3664	1619	Proteobacteria	Alphaproteobacteria	Rhodospirillales	Terasakiellaceae	Terasakiella	Terasakiella	GWHDOWL00000000
AA075	15	611858	3042346	291902	6250	2924	1376	Proteobacteria	Alphaproteobacteria	Sphingomonadales	Sphingomonadaceae	Erythrobacter_A	Erythrobacter_A	GWHDOWM00000000
AA076	52	419247	3891688	157125	3690	3172	1107	Bacteroidota	Bacteroidia	Bacteroidales	Marinifilaceae	Ancylomarina	Ancylomarina	GWHDOWN00000000
AA077	292	81079	4745801	20853	3850	3774	1168	Bacteroidota	Bacteroidia	Cytophagales	Cyclobacteriaceae	Cyclobacterium	Cyclobacterium	GWHDOWO00000000
AA078	32	635559	4459892	375388	6551	4218	1754	Proteobacteria	Alphaproteobacteria	Rhodobacterales	Rhodobacteraceae	Pseudodonghicola	--	GWHDOWP00000000
AA079	43	488950	3723855	151593	5477	3449	1337	Proteobacteria	Alphaproteobacteria	Sphingomonadales	Kordiimonadaceae	Kordiimonas	--	GWHDOWQ00000000
AA080	25	1814196	3865714	400322	4164	3648	1077	Bdellovibrionota	Bacteriovoracia	Bacteriovoracales	Bacteriovoracaceae	GCA-2712005	--	GWHDOWR00000000
AA081	85	202326	2938754	62810	2807	2907	1208	Campylobacterota	Campylobacteria	Campylobacterales	Arcobacteraceae	Poseidonibacter	--	GWHDOWS00000000
AA082	59	1073107	7404577	355602	5814	5402	1376	Planctomycetota	Planctomycetes	Pirellulales	Pirellulaceae	Poly24	Poly24	GWHDOWT00000000
AA083	34	1387085	2677101	1387085	4816	2519	1407	Proteobacteria	Gammaproteobacteria	Enterobacterales	Alteromonadaceae	Pseudidiomarina	--	GWHDOWU00000000
AA084	51	424311	4512180	195904	5477	4087	1737	Proteobacteria	Alphaproteobacteria	Rhodospirillales	Thalassospiraceae	Thalassospira	Thalassospira	GWHDOWV00000000
AA085	31	782922	3130462	714878	6319	2998	1395	Proteobacteria	Alphaproteobacteria	Sphingomonadales	Sphingomonadaceae	Erythrobacter_A	--	GWHDOWW00000000
AA086	51	178882	1937265	73573	3136	1751	743	Firmicutes	Bacilli	Acholeplasmatales	Acholeplasmataceae	MZ-XQ	--	GWHDOWX00000000
AA087	61	231200	2638096	84518	2908	2608	1189	Campylobacterota	Campylobacteria	Campylobacterales	Arcobacteraceae	Halarcobacter	Halarcobacter	GWHDOWY00000000
AA088	29	363080	3887073	150047	4372	3459	1737	Proteobacteria	Gammaproteobacteria	Enterobacterales	Alteromonadaceae	Neptunicella	--	GWHDOWZ00000000
AA089	56	218141	2782069	119067	3491	2514	983	Bacteroidota	Bacteroidia	Flavobacteriales	Weeksellaceae	Ap0902	--	GWHDOXA00000000
AA090	61	753808	4604165	272592	5032	4395	1680	Proteobacteria	Alphaproteobacteria	Rhodospirillales	Terasakiellaceae	Terasakiella	Terasakiella	GWHDOXB00000000
AA091	42	1377589	4817537	1359727	3600	3837	1261	Bacteroidota	Bacteroidia	Bacteroidales	Marinifilaceae	Ancylomarina	--	GWHDOXC00000000
AA092	35	724770	3284689	233640	3891	2857	1026	Bacteroidota	Bacteroidia	Flavobacteriales	Salibacteraceae	GCA-2705995	--	GWHDOXD00000000
AA093	50	583324	4186130	179083	4072	3508	1239	Bacteroidota	Bacteroidia	Flavobacteriales	Flavobacteriaceae	Arenibacter	Arenibacter	GWHDOXE00000000
AA094	26	936582	3787630	303815	3739	3216	1098	Bacteroidota	Rhodothermia	Balneolales	Balneolaceae	Balneola	--	GWHDOXF00000000
AA095	221	50883	2860719	15221	2856	2794	1193	Campylobacterota	Campylobacteria	Campylobacterales	Arcobacteraceae	Poseidonibacter	Poseidonibacter	GWHDOXG00000000
AA096	25	503838	3903635	198049	5367	3545	1662	Proteobacteria	Alphaproteobacteria	Rhodospirillales	Thalassospiraceae	Thalassospira	--	GWHDOXH00000000
AA097	44	582174	4025325	135430	4085	3417	1239	Bacteroidota	Bacteroidia	Flavobacteriales	Flavobacteriaceae	Arenibacter	Arenibacter	GWHDOXI00000000
AA098	126	828336	4965532	151838	5010	4385	1805	Proteobacteria	Gammaproteobacteria	Pseudomonadales	Halomonadaceae	Oceanospirillum	--	GWHDOXJ00000000
AA099	47	889608	2954518	375719	4699	2805	1562	Proteobacteria	Gammaproteobacteria	Enterobacterales	Alteromonadaceae	Idiomarina	Idiomarina	GWHDOXK00000000
AA100	57	311544	3287113	95388	6147	3088	1523	Proteobacteria	Alphaproteobacteria	Rhodobacterales	Rhodobacteraceae	Epibacterium	Epibacterium	GWHDOXL00000000
AA101	19	680702	3821129	259816	3940	3378	1059	Bacteroidota	Bacteroidia	Flavobacteriales	Crocinitomicaceae	UBA6165	--	GWHDOXM00000000
AA102	35	430467	3484098	165167	5584	3324	1406	Proteobacteria	Alphaproteobacteria	Sphingomonadales	Sphingomonadaceae	Parasphingorhabdus	--	GWHDOXN00000000
AA103	26	568516	4016571	339471	4024	3535	1142	Bacteroidota	Bacteroidia	Flavobacteriales	Schleiferiaceae	Owenweeksia	Owenweeksia	GWHDOXO00000000
AA104	117	157161	3649347	53325	4038	3360	1677	Proteobacteria	Gammaproteobacteria	Enterobacterales	Alteromonadaceae	Pseudoalteromonas	Pseudoalteromonas	GWHDOXP00000000
AA105	55	458660	4136080	207427	5034	3906	1654	Proteobacteria	Alphaproteobacteria	Rhodospirillales	Terasakiellaceae	Terasakiella	Terasakiella	GWHDOXQ00000000
AA106	17	565441	2995201	298462	3966	2799	1062	Bacteroidota	Bacteroidia	Flavobacteriales	Flavobacteriaceae	Aequorivita	Aequorivita	GWHDOXR00000000
AA107	60	303155	3272756	99282	3645	2908	1072	Bacteroidota	Bacteroidia	Flavobacteriales	Flavobacteriaceae	Aequorivita	Aequorivita	GWHDOXS00000000
AA108	39	582773	3509542	314681	3431	3249	1114	Bacteroidota	Bacteroidia	Flavobacteriales	Flavobacteriaceae	Algorimicrobium	--	GWHDOXT00000000
AA109	64	561572	4074662	259239	3754	3434	1121	Bacteroidota	Rhodothermia	Balneolales	Balneolaceae	Balneola	--	GWHDOXU00000000
AA110	47	319133	2896547	106806	3523	2689	1035	Bacteroidota	Bacteroidia	Flavobacteriales	Flavobacteriaceae	Xanthomarina	Xanthomarina	GWHDOXV00000000
AA111	166	407630	5769534	130550	5482	5531	2101	Proteobacteria	Gammaproteobacteria	Pseudomonadales	Oleiphilaceae	Marinobacter	--	GWHDOXW00000000
AA112	81	534777	3842330	124041	3643	3368	1102	Bacteroidota	Bacteroidia	Flavobacteriales	Flavobacteriaceae	Aequorivita	Aequorivita	GWHDOXX00000000
AA113	18	394651	3221474	265860	5817	3087	1473	Proteobacteria	Alphaproteobacteria	Rhizobiales	Devosiaceae	DROE01	--	GWHDOXY00000000
AA114	146	183601	3712352	42314	4830	3413	1319	Proteobacteria	Alphaproteobacteria	Sphingomonadales	Kordiimonadaceae	Kordiimonas	--	GWHDOXZ00000000
AA115	15	1159003	3854440	978999	6821	3719	1372	Actinobacteriota	Actinomycetia	Actinomycetales	Microbacteriaceae	Microbacterium	Microbacterium	GWHDOYA00000000
AA116	70	234321	3313172	84748	4339	2778	1467	Proteobacteria	Gammaproteobacteria	Pseudomonadales	Moraxellaceae	Psychrobacter	Psychrobacter	GWHDOYB00000000
AA117	24	1290596	4862032	409846	5453	4517	1918	Proteobacteria	Alphaproteobacteria	Rhodospirillales	Thalassospiraceae	Thalassospira	Thalassospira	GWHDOYC00000000
AA118	163	200409	3608422	37755	6098	3366	1709	Proteobacteria	Gammaproteobacteria	Pseudomonadales	Pseudomonadaceae	Pseudomonas_D	Pseudomonas_D	GWHDOYD00000000
AA119	78	552091	4737249	341434	6021	4420	1860	Proteobacteria	Alphaproteobacteria	Rhodobacterales	Rhodobacteraceae	Epibacterium	Epibacterium	GWHDOYE00000000
AA120	31	859273	6332644	472280	6018	5637	2446	Proteobacteria	Gammaproteobacteria	Pseudomonadales	Pseudomonadaceae	Pseudomonas_E	Pseudomonas_E	GWHDOYF00000000
AA121	32	479483	3862697	214928	6320	3516	1657	Proteobacteria	Alphaproteobacteria	Rhodobacterales	Rhodobacteraceae	Pararhodobacter	Pararhodobacter	GWHDOYG00000000
AA122	25	654019	3818902	295742	4765	3511	1478	Proteobacteria	Alphaproteobacteria	Rhodospirillales	Terasakiellaceae	Terasakiella	--	GWHDOYH00000000
AA123	45	454078	3951966	209211	4555	3600	1725	Proteobacteria	Gammaproteobacteria	Pseudomonadales	Nitrincolaceae	Neptunomonas	--	GWHDOYI00000000
AA124	75	696161	3893928	368049	3783	3224	1087	Bacteroidota	Rhodothermia	Balneolales	Balneolaceae	Balneola	--	GWHDOYJ00000000
AA125	99	127194	2818846	44216	6711	2822	1352	Proteobacteria	Alphaproteobacteria	Caulobacterales	Caulobacteraceae	Brevundimonas	--	GWHDOYK00000000
AA126	88	272902	3854497	107769	5810	3725	1618	Proteobacteria	Alphaproteobacteria	Rhizobiales	Devosiaceae	DROE01	--	GWHDOYL00000000
AA127	28	954021	4762334	308930	5305	4291	1843	Proteobacteria	Alphaproteobacteria	Rhodospirillales	Thalassospiraceae	Thalassospira	Thalassospira	GWHDOYM00000000
AA128	8	2405110	3887130	2405110	4502	3680	1107	Bdellovibrionota	Bacteriovoracia	Bacteriovoracales	Bacteriovoracaceae	--	--	GWHDOYN00000000
AA129	19	1602550	4435075	1096986	5478	4046	1810	Proteobacteria	Alphaproteobacteria	Rhodospirillales	Thalassospiraceae	Thalassospira	Thalassospira	GWHDOYO00000000
AA130	52	789315	3073537	356129	5012	2826	1473	Proteobacteria	Gammaproteobacteria	Enterobacterales	Alteromonadaceae	Pseudidiomarina	--	GWHDOYP00000000
AA131	61	360609	3951549	120349	5451	3710	1762	Proteobacteria	Gammaproteobacteria	Pseudomonadales	Nitrincolaceae	Marinobacterium	Marinobacterium	GWHDOYQ00000000
AA132	55	638953	3400354	186166	3529	3095	1031	Bacteroidota	Bacteroidia	Flavobacteriales	Flavobacteriaceae	Aequorivita	--	GWHDOYR00000000
AA133	103	249076	3616232	68330	5741	3345	1694	Proteobacteria	Gammaproteobacteria	Pseudomonadales	Nitrincolaceae	Marinobacterium	--	GWHDOYS00000000
AA134	22	1460814	7794794	619590	5311	6023	1368	Planctomycetota	Planctomycetes	Planctomycetales	Planctomycetaceae	Gimesia	Gimesia	GWHDOYT00000000
AA135	73	292507	2712392	71474	4236	2539	948	Bacteroidota	Bacteroidia	Flavobacteriales	Flavobacteriaceae	Aequorivita	--	GWHDOYU00000000
AA136	95	213122	3488541	72777	5816	3398	1520	Proteobacteria	Alphaproteobacteria	Rhizobiales	Devosiaceae	--	--	GWHDOYV00000000
AA137	162	200555	4075289	55924	3402	3398	900	Bacteroidota	Kapabacteria	Kapabacteriales	UBA2268	PGYR01	--	GWHDOYW00000000
AA138	47	450342	3745952	157327	6327	3413	1633	Proteobacteria	Alphaproteobacteria	Rhodobacterales	Rhodobacteraceae	Pararhodobacter	Pararhodobacter	GWHDOYX00000000
AA139	71	202829	4175834	100607	5746	3940	1617	Proteobacteria	Alphaproteobacteria	Rhodospirillales	HT1-32	HT1-32	HT1-32	GWHDOYY00000000
AA140	103	882631	5105577	226239	5594	4813	1833	Proteobacteria	Alphaproteobacteria	Rhodobacterales	Rhodobacteraceae	Pseudophaeobacter	--	GWHDOYZ00000000
AA141	16	451060	2421820	364937	4820	2290	1347	Proteobacteria	Gammaproteobacteria	Enterobacterales	Alteromonadaceae	Pseudidiomarina	Pseudidiomarina	GWHDOZA00000000
AA142	12	750871	3100687	459413	6391	2942	1345	Proteobacteria	Alphaproteobacteria	Caulobacterales	Maricaulaceae	Maricaulis	--	GWHDOZB00000000
AA143	64	483336	7097719	182454	5324	5748	1211	Verrucomicrobiota	Verrucomicrobiae	Verrucomicrobiales	DEV007	JABDJT01	--	GWHDOZC00000000
AA144	11	1718533	3253163	1718533	3569	3083	1012	Bdellovibrionota	Bacteriovoracia	Bacteriovoracales	Bacteriovoracaceae	DB6-IX	DB6-IX	GWHDOZD00000000
AA145	50	896201	7834908	387994	5316	6193	1380	Planctomycetota	Planctomycetes	Planctomycetales	Planctomycetaceae	Gimesia	Gimesia	GWHDOZE00000000
AA146	16	1231172	2877098	746372	4388	2643	1422	Proteobacteria	Gammaproteobacteria	Enterobacterales	Kangiellaceae	Kangiella	--	GWHDOZF00000000
AA147	52	388311	3024958	126428	4083	2809	1002	Bacteroidota	Bacteroidia	Flavobacteriales	Flavobacteriaceae	Aequorivita	Aequorivita	GWHDOZG00000000
AA148	94	867312	3844677	145934	3490	3468	1119	Bacteroidota	Bacteroidia	Flavobacteriales	Flavobacteriaceae	Xanthomarina	Xanthomarina	GWHDOZH00000000
AA149	81	284401	4286097	112644	3759	3908	1080	Bdellovibrionota	Bacteriovoracia	Bacteriovoracales	Bacteriovoracaceae	GCA-2712005	--	GWHDOZI00000000
OA001	28	771379	3636842	318825	3751	3054	1089	Bacteroidota	Rhodothermia	Balneolales	Balneolaceae	Balneola	--	GWHDOZJ00000000
OA002	16	645026	3904620	416729	5904	3789	1698	Proteobacteria	Alphaproteobacteria	Rhodobacterales	Rhodobacteraceae	--	--	GWHDOZK00000000
OA003	12	1424615	3799742	558848	4016	3368	1115	Bacteroidota	Bacteroidia	Flavobacteriales	Schleiferiaceae	Owenweeksia	Owenweeksia	GWHDOZL00000000
OA004	28	878237	4485590	510745	6217	4265	1815	Proteobacteria	Alphaproteobacteria	Rhizobiales	Rhizobiaceae	Nitratireductor	Nitratireductor	GWHDOZM00000000
OA005	59	290218	3018503	90715	3289	2723	1011	Bacteroidota	Bacteroidia	Flavobacteriales	Flavobacteriaceae	Meridianimaribacter	Meridianimaribacter	GWHDOZN00000000
OA006	28	689305	4210291	289247	5420	3837	1958	Proteobacteria	Gammaproteobacteria	Pseudomonadales	Pseudomonadaceae	Pseudomonas_E	--	GWHDOZO00000000
OA007	27	874945	5005066	352402	4487	4461	2197	Proteobacteria	Gammaproteobacteria	Enterobacterales	Vibrionaceae	Vibrio	Vibrio	GWHDOZP00000000
OA008	51	473789	3914241	126101	6271	3278	1800	Proteobacteria	Gammaproteobacteria	Pseudomonadales	Halomonadaceae	Cobetia	Cobetia	GWHDOZQ00000000
OA009	50	442604	5304881	204666	6091	4802	2204	Proteobacteria	Gammaproteobacteria	Pseudomonadales	Pseudomonadaceae	Pseudomonas_E	Pseudomonas_E	GWHDOZR00000000
OA010	66	280259	4464798	119725	4854	4024	1928	Proteobacteria	Gammaproteobacteria	Enterobacterales	Shewanellaceae	Shewanella	--	GWHDOZS00000000
OA011	23	869748	5159118	365993	6496	4762	2218	Proteobacteria	Gammaproteobacteria	Pseudomonadales	Pseudomonadaceae	Pseudomonas_E	Pseudomonas_E	GWHDOZT00000000
OA012	67	637869	4317329	185192	6023	3988	2030	Proteobacteria	Gammaproteobacteria	Pseudomonadales	Pseudomonadaceae	Pseudomonas_A	Pseudomonas_A	GWHDOZU00000000
OA013	66	601112	4783596	350977	5833	4619	1797	Proteobacteria	Alphaproteobacteria	Rhodobacterales	Rhodobacteraceae	--	--	GWHDOZV00000000
OA014	6	1186648	2630045	384972	4705	2491	1501	Proteobacteria	Gammaproteobacteria	Enterobacterales	Alteromonadaceae	Idiomarina	Idiomarina	GWHDOZW00000000
OA015	39	308677	3024710	148445	6378	2873	1338	Proteobacteria	Alphaproteobacteria	Caulobacterales	Maricaulaceae	Maricaulis	--	GWHDOZX00000000
OA016	24	432688	3043139	229707	6277	2851	1343	Proteobacteria	Alphaproteobacteria	Caulobacterales	Maricaulaceae	Maricaulis	--	GWHDOZY00000000
OA017	169	93503	3149062	29680	3123	2873	995	Bacteroidota	Bacteroidia	Flavobacteriales	Flavobacteriaceae	Mesoflavibacter	Mesoflavibacter	GWHDOZZ00000000
OA018	11	825175	3378548	640795	3680	3221	1179	Bdellovibrionota	Bacteriovoracia	Bacteriovoracales	Bacteriovoracaceae	Halobacteriovorax	Halobacteriovorax	GWHDPAA00000000
OA019	54	514545	3599992	148975	3780	3373	1155	Bacteroidota	Bacteroidia	Flavobacteriales	Flavobacteriaceae	Aequorivita	--	GWHDPAB00000000
OA020	23	616389	3760112	353989	5817	3385	1642	Proteobacteria	Gammaproteobacteria	Pseudomonadales	Alcanivoracaceae	Alcanivorax	Alcanivorax	GWHDPAC00000000
OA021	42	330629	2970888	203047	3266	2694	1017	Bacteroidota	Bacteroidia	Flavobacteriales	Flavobacteriaceae	Oceanihabitans	Oceanihabitans	GWHDPAD00000000
OA022	37	695681	3273270	260138	6289	3089	1425	Proteobacteria	Alphaproteobacteria	Caulobacterales	Maricaulaceae	Maricaulis	Maricaulis	GWHDPAE00000000
OA023	36	1233095	3829933	709228	5563	3599	1505	Proteobacteria	Alphaproteobacteria	Parvibaculales	Parvibaculaceae	Mf105b01	Mf105b01	GWHDPAF00000000
OA024	40	666598	3255141	209234	3309	2917	1069	Bacteroidota	Bacteroidia	Flavobacteriales	Flavobacteriaceae	Meridianimaribacter	Meridianimaribacter	GWHDPAG00000000
OA025	35	540499	3317156	151334	5743	3092	1602	Proteobacteria	Gammaproteobacteria	Pseudomonadales	Spongiibacteraceae	Spongiibacter	Spongiibacter	GWHDPAH00000000
OA026	130	196051	4067198	63609	3783	3538	1832	Proteobacteria	Gammaproteobacteria	Enterobacterales	Psychromonadaceae	Psychromonas	--	GWHDPAI00000000
OA027	8	1138219	2818911	457099	4688	2657	1518	Proteobacteria	Gammaproteobacteria	Enterobacterales	Alteromonadaceae	Idiomarina	--	GWHDPAJ00000000
OA028	32	512844	2648959	162277	2915	2625	1201	Campylobacterota	Campylobacteria	Campylobacterales	Arcobacteraceae	Halarcobacter	Halarcobacter	GWHDPAK00000000
OA029	34	935187	4305007	333089	5863	4135	1752	Proteobacteria	Alphaproteobacteria	Rhodobacterales	Rhodobacteraceae	--	--	GWHDPAL00000000
OA030	10	2058306	3785587	2058306	4169	3602	1071	Bdellovibrionota	Bacteriovoracia	Bacteriovoracales	Bacteriovoracaceae	GCA-2712005	--	GWHDPAM00000000
OA031	92	305094	3416067	73748	4196	3175	1067	Bacteroidota	Bacteroidia	Flavobacteriales	Flavobacteriaceae	Aequorivita	--	GWHDPAN00000000
OA032	77	313082	4143923	120239	4933	3789	1733	Proteobacteria	Gammaproteobacteria	Pseudomonadales	Halomonadaceae	Oceanospirillum	--	GWHDPAO00000000
OA033	17	890679	3160263	874735	3576	2977	992	Bdellovibrionota	Bacteriovoracia	Bacteriovoracales	Bacteriovoracaceae	DB6-IX	DB6-IX	GWHDPAP00000000
OA034	44	315269	3409386	178677	3445	3130	1105	Bacteroidota	Bacteroidia	Flavobacteriales	Flavobacteriaceae	Algorimicrobium	--	GWHDPAQ00000000
OA035	39	653621	4243328	252083	5385	3972	1860	Proteobacteria	Gammaproteobacteria	Pseudomonadales	Nitrincolaceae	Marinobacterium	--	GWHDPAR00000000
OA036	40	2011430	3486622	2011430	4430	3245	1538	Proteobacteria	Gammaproteobacteria	Enterobacterales	Kangiellaceae	Kangiella	--	GWHDPAS00000000
OA037	32	720124	4143158	308435	5032	3940	1624	Proteobacteria	Alphaproteobacteria	Rhodospirillales	Terasakiellaceae	Terasakiella	Terasakiella	GWHDPAT00000000
OA038	28	622641	3894408	312734	5454	3622	1436	Proteobacteria	Alphaproteobacteria	Sphingomonadales	Kordiimonadaceae	Kordiimonas	--	GWHDPAU00000000
OA039	34	423361	3499890	247045	3173	3270	1134	Bacteroidota	Bacteroidia	Flavobacteriales	Flavobacteriaceae	Tenacibaculum	--	GWHDPAV00000000
OA040	75	481755	4527706	129721	6007	4292	1986	Proteobacteria	Gammaproteobacteria	Pseudomonadales	Pseudomonadaceae	Pseudomonas_A	Pseudomonas_A	GWHDPAW00000000
OA041	26	1154875	4751563	380661	5920	4451	1863	Proteobacteria	Alphaproteobacteria	Rhodobacterales	Rhodobacteraceae	Epibacterium	Epibacterium	GWHDPAX00000000
OA042	100	917107	4594660	721881	5510	4371	1544	Proteobacteria	Alphaproteobacteria	Parvibaculales	Parvibaculaceae	Mf105b01	Mf105b01	GWHDPAY00000000
OA043	30	773485	3801769	585221	5537	3518	1667	Proteobacteria	Alphaproteobacteria	Rhizobiales	Stappiaceae	--	--	GWHDPAZ00000000
OA044	206	181780	6383491	51364	5584	5095	1205	Verrucomicrobiota	Verrucomicrobiae	Verrucomicrobiales	DEV007	Arctic95D-9	--	GWHDPBA00000000
OA045	24	1537114	2837871	1537114	5007	2656	1456	Proteobacteria	Gammaproteobacteria	Enterobacterales	Alteromonadaceae	Pseudidiomarina	Pseudidiomarina	GWHDPBB00000000
OA046	141	87133	2436442	23444	3010	2371	1078	Campylobacterota	Campylobacteria	Campylobacterales	Arcobacteraceae	CAIJNA01	--	GWHDPBC00000000
OA047	14	828183	3580609	548290	4882	3169	1623	Proteobacteria	Gammaproteobacteria	Pseudomonadales	Halomonadaceae	Oceanospirillum	--	GWHDPBD00000000
OA048	32	759930	3332584	345111	4848	3061	1647	Proteobacteria	Gammaproteobacteria	Pseudomonadales	Pseudomonadaceae	Pseudomonas_C	Pseudomonas_C	GWHDPBE00000000
OA049	49	324199	3054616	178570	4228	2802	1068	Bacteroidota	Bacteroidia	Flavobacteriales	Flavobacteriaceae	Aequorivita	--	GWHDPBF00000000
OA050	104	107122	2644847	36020	3242	2393	986	Bacteroidota	Bacteroidia	Flavobacteriales	Flavobacteriaceae	Mangrovimonas	--	GWHDPBG00000000
OA051	60	530259	4879085	153540	5296	4467	1818	Proteobacteria	Alphaproteobacteria	Rhodospirillales	Thalassospiraceae	Thalassospira	Thalassospira	GWHDPBH00000000
OA052	152	87490	2374673	19182	2876	2313	1104	Campylobacterota	Campylobacteria	Campylobacterales	Arcobacteraceae	Poseidonibacter	--	GWHDPBI00000000
OA053	52	700057	4931103	311077	6123	4644	1865	Proteobacteria	Alphaproteobacteria	Rhodobacterales	Rhodobacteraceae	Pseudophaeobacter_A	Pseudophaeobacter_A	GWHDPBJ00000000
OA054	189	103245	3572241	26366	4721	3285	1472	Proteobacteria	Gammaproteobacteria	Pseudomonadales	Nitrincolaceae	Motiliproteus	--	GWHDPBK00000000
OA055	35	635027	3822733	214892	6124	3703	1721	Proteobacteria	Alphaproteobacteria	Rhodobacterales	Rhodobacteraceae	--	--	GWHDPBL00000000
OA056	43	1887135	4083859	474883	5798	3985	1672	Proteobacteria	Alphaproteobacteria	Rhizobiales	Devosiaceae	Pelagibacterium	--	GWHDPBM00000000
OA057	142	174003	4782464	51439	6245	4427	2018	Proteobacteria	Gammaproteobacteria	Pseudomonadales	Pseudomonadaceae	Pseudomonas_A	Pseudomonas_A	GWHDPBN00000000
OA058	58	737863	3954880	208790	6059	3796	1671	Proteobacteria	Alphaproteobacteria	Rhodobacterales	Rhodobacteraceae	Roseovarius	--	GWHDPBO00000000
OA059	223	88441	4481885	27057	3989	3850	1213	Bacteroidota	Bacteroidia	Cytophagales	Cyclobacteriaceae	Algoriphagus	--	GWHDPBP00000000
OA060	8	1206819	3857068	741038	4583	3667	1114	Bdellovibrionota	Bacteriovoracia	Bacteriovoracales	Bacteriovoracaceae	--	--	GWHDPBQ00000000
OA061	22	357504	3269145	318238	4091	3075	1071	Bacteroidota	Bacteroidia	Flavobacteriales	Flavobacteriaceae	Aequorivita	Aequorivita	GWHDPBR00000000
OA062	61	569351	7395685	228197	5818	5417	1353	Planctomycetota	Planctomycetes	Pirellulales	Pirellulaceae	Poly24	Poly24	GWHDPBS00000000
OA063	8	2495812	3735371	2495812	4120	3340	1159	Bacteroidota	Bacteroidia	Flavobacteriales	Flavobacteriaceae	Muricauda	--	GWHDPBT00000000
OA064	35	695388	3975258	241181	4693	3666	1840	Proteobacteria	Gammaproteobacteria	Pseudomonadales	Marinomonadaceae	Marinomonas	--	GWHDPBU00000000
OA065	57	1238821	3968972	244974	5239	3581	1454	Proteobacteria	Alphaproteobacteria	Sphingomonadales	Emcibacteraceae	Emcibacter_A	Emcibacter_A	GWHDPBV00000000
OA066	131	299995	7926371	107733	5019	6190	1295	Planctomycetota	Planctomycetes	Planctomycetales	Planctomycetaceae	Gimesia	Gimesia	GWHDPBW00000000
OA067	6	1183459	2705226	438813	4687	2579	1510	Proteobacteria	Gammaproteobacteria	Enterobacterales	Alteromonadaceae	Idiomarina	Idiomarina	GWHDPBX00000000
OA068	225	147426	6663761	43892	5341	5288	1234	Planctomycetota	Planctomycetes	Planctomycetales	Planctomycetaceae	Gimesia	Gimesia	GWHDPBY00000000
OA069	15	1061874	3980720	992490	5487	3745	1444	Proteobacteria	Alphaproteobacteria	Sphingomonadales	Kordiimonadaceae	Kordiimonas	--	GWHDPBZ00000000
OA070	31	870389	7736501	537945	5304	5987	1349	Planctomycetota	Planctomycetes	Planctomycetales	Planctomycetaceae	Gimesia	Gimesia	GWHDPCA00000000
OA071	75	287665	3996626	96238	5975	3702	1807	Proteobacteria	Gammaproteobacteria	Pseudomonadales	Pseudomonadaceae	Pseudomonas_D	Pseudomonas_D	GWHDPCB00000000
OA072	62	477744	3405311	150928	3544	3053	1080	Bacteroidota	Bacteroidia	Flavobacteriales	Flavobacteriaceae	Aequorivita	--	GWHDPCC00000000
OA073	33	452208	3816006	213431	3786	3483	1159	Bacteroidota	Bacteroidia	Flavobacteriales	Flavobacteriaceae	Flavobacterium	Flavobacterium	GWHDPCD00000000
OA074	69	256069	3320522	121702	4052	3094	1039	Bacteroidota	Bacteroidia	Flavobacteriales	Flavobacteriaceae	Aequorivita	Aequorivita	GWHDPCE00000000
OA075	40	653055	4119728	160942	5361	3748	1689	Proteobacteria	Alphaproteobacteria	Rhodospirillales	Thalassospiraceae	Thalassospira	--	GWHDPCF00000000
OA076	49	810101	7650909	316104	5049	5958	1348	Planctomycetota	Planctomycetes	Planctomycetales	Planctomycetaceae	Gimesia	Gimesia	GWHDPCG00000000
OA077	50	569242	4434844	253633	6041	4144	2017	Proteobacteria	Gammaproteobacteria	Pseudomonadales	Pseudomonadaceae	Pseudomonas_A	Pseudomonas_A	GWHDPCH00000000
OA078	26	700181	4083320	420325	5021	3868	1632	Proteobacteria	Alphaproteobacteria	Rhodospirillales	Terasakiellaceae	Terasakiella	Terasakiella	GWHDPCI00000000
OA079	13	873908	2940484	454686	3258	2652	1085	Bacteroidota	Bacteroidia	Flavobacteriales	Flavobacteriaceae	Mangrovimonas	--	GWHDPCJ00000000
OA080	88	239207	3506979	71373	3719	3195	1056	Bacteroidota	Bacteroidia	Flavobacteriales	Flavobacteriaceae	Aequorivita	--	GWHDPCK00000000
OA081	51	998549	4302530	673728	5147	3679	1676	Proteobacteria	Gammaproteobacteria	Pseudomonadales	Halomonadaceae	Oceanospirillum	--	GWHDPCL00000000
OA082	41	404082	3734581	176370	4844	3328	1210	Spirochaetota	Spirochaetia	Sphaerochaetales	Sphaerochaetaceae	Sphaerochaeta	--	GWHDPCM00000000
OA083	22	374392	2722543	213087	3310	2600	1243	Firmicutes_A	Clostridia	Peptostreptococcales	Filifactoraceae	Acetoanaerobium	Acetoanaerobium	GWHDPCN00000000
OA084	28	562966	4215229	321508	4047	4113	1516	Firmicutes_A	Clostridia	Peptostreptococcales	Natronincolaceae	--	--	GWHDPCO00000000
OA085	75	443876	4473364	120871	5035	4163	1851	Proteobacteria	Gammaproteobacteria	Pseudomonadales	Nitrincolaceae	Nitrincola	--	GWHDPCP00000000
OA086	42	617471	4203924	153837	5861	3799	1804	Proteobacteria	Gammaproteobacteria	Enterobacterales	Shewanellaceae	Ferrimonas	--	GWHDPCQ00000000
OA087	22	842291	4132724	338613	5450	3743	1792	Proteobacteria	Gammaproteobacteria	Pseudomonadales	Nitrincolaceae	Marinobacterium	--	GWHDPCR00000000
OA088	34	357819	3254588	169305	5821	3127	1493	Proteobacteria	Alphaproteobacteria	Rhizobiales	Devosiaceae	--	--	GWHDPCS00000000
OA089	11	474169	1817592	298460	3140	1723	798	Firmicutes	Bacilli	Acholeplasmatales	Acholeplasmataceae	MZ-XQ	MZ-XQ	GWHDPCT00000000
OA090	12	1121990	2985458	415441	6242	2836	1327	Proteobacteria	Alphaproteobacteria	Sphingomonadales	Sphingomonadaceae	Erythrobacter_A	Erythrobacter_A	GWHDPCU00000000
OA091	16	728183	3816012	388289	6297	3562	1547	Proteobacteria	Alphaproteobacteria	Rhodospirillales	Casp-alpha2	UBA1479	--	GWHDPCV00000000
OA092	28	544820	4265983	271728	6371	3956	1652	Proteobacteria	Alphaproteobacteria	Minwuiales	Minwuiaceae	Minwuia	--	GWHDPCW00000000
OA093	83	366992	4087424	111715	5580	3765	1865	Proteobacteria	Gammaproteobacteria	Pseudomonadales	Halomonadaceae	Halomonas	--	GWHDPCX00000000
OA094	226	224180	5898378	47556	6440	5326	2012	Proteobacteria	Gammaproteobacteria	Burkholderiales	Burkholderiaceae	Achromobacter	--	GWHDPCY00000000
OA095	20	1017774	2874159	520915	4919	2634	1437	Proteobacteria	Gammaproteobacteria	Enterobacterales	Alteromonadaceae	Pseudidiomarina	Pseudidiomarina	GWHDPCZ00000000
OA096	65	1074414	3531858	154123	3523	3222	1106	Bacteroidota	Bacteroidia	Flavobacteriales	Flavobacteriaceae	Xanthomarina	Xanthomarina	GWHDPDA00000000
OA097	44	550352	4608401	197226	4422	4242	2000	Proteobacteria	Gammaproteobacteria	Pseudomonadales	Marinomonadaceae	Marinomonas	Marinomonas	GWHDPDB00000000
OA098	13	1067702	3896370	931198	6295	3612	1559	Proteobacteria	Alphaproteobacteria	Rhodospirillales	Casp-alpha2	UBA1479	--	GWHDPDC00000000
OA099	105	285457	4944934	74351	5968	4393	2109	Proteobacteria	Gammaproteobacteria	Pseudomonadales	Halomonadaceae	Halomonas	Halomonas	GWHDPDD00000000
OA100	48	508093	4322600	153326	6523	3979	1765	Proteobacteria	Alphaproteobacteria	Rhodobacterales	Rhodobacteraceae	Marinovum	--	GWHDPDE00000000
OA101	49	923520	5316594	293618	6691	4929	1903	Proteobacteria	Alphaproteobacteria	Rhodobacterales	Rhodobacteraceae	AWRV01	--	GWHDPDF00000000
OA102	26	690237	4718280	387417	6211	4504	1862	Proteobacteria	Alphaproteobacteria	Rhizobiales	Rhizobiaceae	Nitratireductor	Nitratireductor	GWHDPDG00000000
OA103	16	726648	3273084	415831	4923	3119	1577	Proteobacteria	Alphaproteobacteria	Rhizobiales	Rhizobiaceae	Ahrensia	--	GWHDPDH00000000
OA104	14	1018202	3862213	628552	4017	3425	1129	Bacteroidota	Bacteroidia	Flavobacteriales	Schleiferiaceae	Owenweeksia	Owenweeksia	GWHDPDI00000000
OA105	15	1091584	4400460	550481	6021	4087	2066	Proteobacteria	Gammaproteobacteria	Pseudomonadales	Pseudomonadaceae	Pseudomonas_A	Pseudomonas_A	GWHDPDJ00000000
OA106	25	663997	4168225	258096	5586	3857	1882	Proteobacteria	Gammaproteobacteria	Pseudomonadales	Nitrincolaceae	Marinobacterium	Marinobacterium	GWHDPDK00000000
OA107	26	944943	4179705	409666	5760	4130	1777	Proteobacteria	Alphaproteobacteria	Rhodobacterales	Rhodobacteraceae	Celeribacter	Celeribacter	GWHDPDL00000000
OA108	60	1075928	7311203	250998	5578	5706	1401	Planctomycetota	Planctomycetes	Pirellulales	Pirellulaceae	Rhodopirellula_A	Rhodopirellula_A	GWHDPDM00000000
OA109	13	2065190	4358808	857681	5744	4055	1650	Proteobacteria	Alphaproteobacteria	Rhodospirillales	HT1-32	HT1-32	HT1-32	GWHDPDN00000000
OA110	95	675304	4462577	197503	5283	4030	1832	Proteobacteria	Gammaproteobacteria	Pseudomonadales	Oleiphilaceae	Marinobacter	--	GWHDPDO00000000
OA111	96	157848	3096524	55948	4772	2908	1459	Proteobacteria	Gammaproteobacteria	Enterobacterales	Alteromonadaceae	Idiomarina	Idiomarina	GWHDPDP00000000
OA112	17	1555027	7625188	693330	5306	5891	1349	Planctomycetota	Planctomycetes	Planctomycetales	Planctomycetaceae	Gimesia	Gimesia	GWHDPDQ00000000
OA113	24	699949	3839896	277917	6381	3594	1745	Proteobacteria	Alphaproteobacteria	Rhodobacterales	Rhodobacteraceae	Leisingera	--	GWHDPDR00000000
OA114	113	200574	3594522	45602	6358	3416	1451	Proteobacteria	Alphaproteobacteria	Rhodobacterales	Rhodobacteraceae	Roseovarius	Roseovarius	GWHDPDS00000000
OA115	34	1055800	3489116	480608	6042	3371	1628	Proteobacteria	Alphaproteobacteria	Rhodobacterales	Rhodobacteraceae	Sulfitobacter	--	GWHDPDT00000000
OA116	22	797050	2964901	239931	3246	2721	1027	Bacteroidota	Bacteroidia	Flavobacteriales	Flavobacteriaceae	Mangrovimonas	--	GWHDPDU00000000
OA117	33	583742	4733045	279460	5083	4325	2231	Proteobacteria	Gammaproteobacteria	Enterobacterales	Vibrionaceae	Vibrio	Vibrio	GWHDPDV00000000
OA118	33	561455	4388868	200947	4085	3891	1874	Proteobacteria	Gammaproteobacteria	Enterobacterales	Alteromonadaceae	Pseudoalteromonas	Pseudoalteromonas	GWHDPDW00000000
OA119	40	691064	5058073	349791	5991	4800	1828	Proteobacteria	Alphaproteobacteria	Rhodobacterales	Rhodobacteraceae	CAU-1492	--	GWHDPDX00000000
OA120	27	1011837	4886835	300195	4471	4385	2146	Proteobacteria	Gammaproteobacteria	Enterobacterales	Vibrionaceae	Vibrio	Vibrio	GWHDPDY00000000
OA121	34	595379	3652577	374798	3791	3433	1091	Bacteroidota	Bacteroidia	Flavobacteriales	Flavobacteriaceae	Aequorivita	Aequorivita	GWHDPDZ00000000
OA122	27	533148	4092387	285535	6108	3873	1757	Proteobacteria	Alphaproteobacteria	Rhodobacterales	Rhodobacteraceae	--	--	GWHDPEA00000000
OA123	58	334443	3841628	108065	3754	3473	1123	Bacteroidota	Bacteroidia	Flavobacteriales	Flavobacteriaceae	Flavobacterium	--	GWHDPEB00000000
OA124	46	1477885	5232970	575957	5655	5021	1807	Proteobacteria	Alphaproteobacteria	Rhodobacterales	Rhodobacteraceae	Amylibacter	Amylibacter	GWHDPEC00000000
SA001	13	672968	3415071	449889	5820	3255	1572	Proteobacteria	Alphaproteobacteria	Rhizobiales	Devosiaceae	--	--	GWHDPED00000000
SA002	16	961454	4694178	648558	5023	4360	1686	Proteobacteria	Alphaproteobacteria	Rhodospirillales	Casp-alpha2	JABMNT01	--	GWHDPEE00000000
SA003	72	517873	5451174	200973	6635	5133	2004	Proteobacteria	Alphaproteobacteria	Rhodobacterales	Rhodobacteraceae	Salipiger	Salipiger	GWHDPEF00000000
SA004	34	808090	4420065	517910	5459	4108	1501	Proteobacteria	Alphaproteobacteria	Sphingomonadales	Kordiimonadaceae	Kordiimonas	--	GWHDPEG00000000
SA005	62	447054	5031060	192478	6386	4733	1798	Proteobacteria	Alphaproteobacteria	Rhodobacterales	Rhodobacteraceae	Antarctobacter	--	GWHDPEH00000000
SA006	11	1256905	2978304	543435	3533	2757	1061	Bacteroidota	Bacteroidia	Flavobacteriales	Flavobacteriaceae	Xanthomarina	Xanthomarina	GWHDPEI00000000
SA007	61	265149	3931638	130437	6962	3651	1583	Proteobacteria	Alphaproteobacteria	Rhodobacterales	Rhodobacteraceae	Rhodobacter_B	--	GWHDPEJ00000000
SA008	59	499445	4128308	192828	6053	4018	1655	Proteobacteria	Alphaproteobacteria	Rhodobacterales	Rhodobacteraceae	Roseovarius	--	GWHDPEK00000000
SA009	89	332931	5612851	100640	3972	4684	1312	Bacteroidota	Bacteroidia	Flavobacteriales	Flavobacteriaceae	Arenibacter	Arenibacter	GWHDPEL00000000
SA010	78	226234	3154362	66848	3292	2867	1004	Bacteroidota	Bacteroidia	Flavobacteriales	Flavobacteriaceae	Meridianimaribacter	Meridianimaribacter	GWHDPEM00000000
SA011	10	2024004	4339128	1054631	5376	4076	1624	Proteobacteria	Alphaproteobacteria	Rhodospirillales	Casp-alpha2	JABMNT01	--	GWHDPEN00000000
SA012	29	753301	4515566	226566	5838	4004	1812	Proteobacteria	Alphaproteobacteria	Rhizobiales	Stappiaceae	Roseibium	--	GWHDPEO00000000
SA013	53	1005430	7465505	406923	4990	5814	1321	Planctomycetota	Planctomycetes	Planctomycetales	Planctomycetaceae	Gimesia	--	GWHDPEP00000000
SA014	18	769346	2991572	305582	3555	2795	1052	Bacteroidota	Bacteroidia	Flavobacteriales	Flavobacteriaceae	Xanthomarina	Xanthomarina	GWHDPEQ00000000
SA015	41	1760699	3955005	428136	3365	3384	1180	Bacteroidota	Bacteroidia	Flavobacteriales	Flavobacteriaceae	Winogradskyella	Winogradskyella	GWHDPER00000000
SA016	12	766686	3893715	634489	4558	3549	1200	Bacteroidota	Bacteroidia	Flavobacteriales	Flavobacteriaceae	Muricauda	Muricauda	GWHDPES00000000
SA017	48	462710	4128914	232877	6118	3928	1762	Proteobacteria	Alphaproteobacteria	Rhodobacterales	Rhodobacteraceae	--	--	GWHDPET00000000
SA018	13	582843	3065814	395583	5840	2915	1453	Proteobacteria	Alphaproteobacteria	Rhizobiales	Devosiaceae	DROE01	--	GWHDPEU00000000
SA019	132	274736	4575845	72321	6576	4277	1762	Proteobacteria	Alphaproteobacteria	Rhizobiales	Stappiaceae	Stappia	--	GWHDPEV00000000
SA020	31	861068	4308638	235566	5271	3988	2038	Proteobacteria	Gammaproteobacteria	Pseudomonadales	Halomonadaceae	Halomonas	Halomonas	GWHDPEW00000000
SA021	114	103897	3275719	42969	5863	3052	1492	Proteobacteria	Gammaproteobacteria	Pseudomonadales	Alcanivoracaceae	Alcanivorax	Alcanivorax	GWHDPEX00000000
SA022	39	917220	5001184	484851	5322	4570	1898	Proteobacteria	Alphaproteobacteria	Rhodospirillales	Thalassospiraceae	Thalassospira	Thalassospira	GWHDPEY00000000
SA023	16	1178969	2737426	401348	4694	2579	1526	Proteobacteria	Gammaproteobacteria	Enterobacterales	Alteromonadaceae	Idiomarina	Idiomarina	GWHDPEZ00000000
SA024	33	897999	5917821	250850	5584	4643	1161	Verrucomicrobiota	Verrucomicrobiae	Verrucomicrobiales	DEV007	Arctic95D-9	--	GWHDPFA00000000
SA025	8	1639901	4233651	832749	5968	3840	1786	Proteobacteria	Alphaproteobacteria	Rhizobiales	Stappiaceae	Roseibium	--	GWHDPFB00000000
SA026	26	712144	4704459	371383	6724	4531	1781	Proteobacteria	Alphaproteobacteria	Rhodobacterales	Rhodobacteraceae	Salipiger	--	GWHDPFC00000000
SA027	102	392283	4781241	126511	4184	4188	1161	Bacteroidota	Bacteroidia	Flavobacteriales	Schleiferiaceae	Owenweeksia	--	GWHDPFD00000000
SA028	15	990995	3396426	310986	5966	3250	1618	Proteobacteria	Alphaproteobacteria	Rhodobacterales	Rhodobacteraceae	Celeribacter	--	GWHDPFE00000000
SA029	40	398352	3821106	172866	6378	3639	1562	Proteobacteria	Alphaproteobacteria	Rhizobiales	Devosiaceae	Devosia_A	--	GWHDPFF00000000
SA030	27	622390	4371955	404673	5658	3950	1859	Proteobacteria	Gammaproteobacteria	Pseudomonadales	Oleiphilaceae	Marinobacter	Marinobacter	GWHDPFG00000000
SA031	11	882911	2995087	410241	6403	2832	1366	Proteobacteria	Alphaproteobacteria	Caulobacterales	Maricaulaceae	Maricaulis	--	GWHDPFH00000000
SA032	51	318117	4493132	179407	5910	4120	1781	Proteobacteria	Alphaproteobacteria	Rhizobiales	Stappiaceae	Roseibium	--	GWHDPFI00000000
SA033	50	669943	5809215	353445	4843	5070	1755	Desulfobacterota	Desulfobulbia	Desulfobulbales	Desulfocapsaceae	Desulfopila	Desulfopila	GWHDPFJ00000000
SA034	28	684492	4288325	311100	5495	3977	1951	Proteobacteria	Gammaproteobacteria	Pseudomonadales	Oleiphilaceae	Marinobacter	--	GWHDPFK00000000
SA035	24	456603	4611471	331562	6001	4378	1847	Proteobacteria	Alphaproteobacteria	Rhizobiales	Rhizobiaceae	Hoeflea	--	GWHDPFL00000000
SA036	60	223429	2930926	122523	2915	2849	1236	Campylobacterota	Campylobacteria	Campylobacterales	Arcobacteraceae	Halarcobacter	Halarcobacter	GWHDPFM00000000
SA037	30	913671	3503155	259986	3935	3284	1250	Firmicutes_A	Clostridia	Peptostreptococcales	Acidaminobacteraceae	UBA5201	--	GWHDPFN00000000
SA038	107	233005	3526175	64935	3323	3194	1032	Bacteroidota	Bacteroidia	Flavobacteriales	Flavobacteriaceae	Winogradskyella	--	GWHDPFO00000000
SA039	83	609174	4339448	346258	3773	3568	1114	Bacteroidota	Rhodothermia	Balneolales	Balneolaceae	Balneola	--	GWHDPFP00000000
SA040	39	354524	3437625	140616	5977	3305	1577	Proteobacteria	Alphaproteobacteria	Rhodobacterales	Rhodobacteraceae	UBA3069	--	GWHDPFQ00000000
SA041	53	196773	3021197	109544	6233	2915	1296	Proteobacteria	Alphaproteobacteria	Sphingomonadales	Sphingomonadaceae	Erythrobacter_A	Erythrobacter_A	GWHDPFR00000000
SA042	73	242415	2996814	64315	4081	2825	975	Bacteroidota	Bacteroidia	Flavobacteriales	Flavobacteriaceae	Aequorivita	Aequorivita	GWHDPFS00000000
SA043	26	607082	4329100	265910	6755	4002	1775	Proteobacteria	Alphaproteobacteria	Rhodobacterales	Rhodobacteraceae	AWRV01	--	GWHDPFT00000000
SA044	64	1021182	4657542	211918	4222	4141	1125	Bacteroidota	Bacteroidia	Flavobacteriales	Schleiferiaceae	Owenweeksia	--	GWHDPFU00000000
SA045	49	342135	3533684	177881	3783	3115	1052	Bacteroidota	Bacteroidia	Flavobacteriales	Flavobacteriaceae	Aequorivita	--	GWHDPFV00000000
SA046	22	728977	4289398	340331	5370	3915	1835	Proteobacteria	Gammaproteobacteria	Pseudomonadales	Nitrincolaceae	Marinobacterium	--	GWHDPFW00000000
SA047	37	946156	3748475	368042	6279	3511	1489	Proteobacteria	Alphaproteobacteria	Caulobacterales	Maricaulaceae	Maricaulis	Maricaulis	GWHDPFX00000000
SA048	30	1016766	5900257	322431	6088	5361	1984	Proteobacteria	Alphaproteobacteria	Rhizobiales	Stappiaceae	Roseibium	--	GWHDPFY00000000
SA049	52	265517	3928567	123575	6854	3759	1351	Actinobacteriota	Actinomycetia	Actinomycetales	Microbacteriaceae	Microbacterium	Microbacterium	GWHDPFZ00000000
SA050	25	1202938	4873099	820190	5221	4499	2754	Proteobacteria	Gammaproteobacteria	Enterobacterales	Enterobacteriaceae	Citrobacter	Citrobacter	GWHDPGA00000000
SA051	49	472132	5967307	248963	6643	5656	2066	Proteobacteria	Alphaproteobacteria	Rhodobacterales	Rhodobacteraceae	Salipiger	--	GWHDPGB00000000
SA052	47	424147	4016281	228982	5745	3858	1746	Proteobacteria	Alphaproteobacteria	Rhodobacterales	Rhodobacteraceae	Celeribacter	--	GWHDPGC00000000
SA053	19	957758	3774439	687438	6750	3337	1667	Proteobacteria	Gammaproteobacteria	Xanthomonadales	Rhodanobacteraceae	Rhodanobacter	Rhodanobacter	GWHDPGD00000000
SA054	33	349072	3131073	180972	6755	2839	1272	Actinobacteriota	Actinomycetia	Mycobacteriales	Mycobacteriaceae	Corynebacterium	Corynebacterium	GWHDPGE00000000
SA055	20	1158981	3002154	345292	3525	2741	1062	Bacteroidota	Bacteroidia	Flavobacteriales	Flavobacteriaceae	Xanthomarina	Xanthomarina	GWHDPGF00000000
SA056	33	741643	4741599	423229	6041	4403	2095	Proteobacteria	Gammaproteobacteria	Pseudomonadales	Pseudomonadaceae	Pseudomonas_A	Pseudomonas_A	GWHDPGG00000000
SA057	135	172418	3420752	34113	3300	2878	1114	Bacteroidota	Bacteroidia	Flavobacteriales	Flavobacteriaceae	Joostella	Joostella	GWHDPGH00000000
SA058	65	292237	3896036	90867	5528	3553	1434	Proteobacteria	Alphaproteobacteria	Sphingomonadales	Kordiimonadaceae	Kordiimonas	--	GWHDPGI00000000
SA059	50	471981	3081195	170665	3112	2799	1060	Bacteroidota	Bacteroidia	Flavobacteriales	Flavobacteriaceae	Polaribacter_A	--	GWHDPGJ00000000
SA060	14	1163033	2815461	395517	4699	2627	1538	Proteobacteria	Gammaproteobacteria	Enterobacterales	Alteromonadaceae	Idiomarina	--	GWHDPGK00000000
SA061	42	911022	8127421	416357	5069	6328	1353	Planctomycetota	Planctomycetes	Planctomycetales	Planctomycetaceae	Gimesia	--	GWHDPGL00000000
SA062	32	1009345	3350131	672286	4734	3098	1615	Proteobacteria	Gammaproteobacteria	Pseudomonadales	Pseudomonadaceae	Pseudomonas_C	Pseudomonas_C	GWHDPGM00000000
SA063	24	799371	3833819	576798	4571	3512	1865	Proteobacteria	Gammaproteobacteria	Pseudomonadales	Marinomonadaceae	Marinomonas	Marinomonas	GWHDPGN00000000
SA064	114	207238	5198102	82031	5333	4721	1902	Proteobacteria	Alphaproteobacteria	Rhodospirillales	Thalassospiraceae	Thalassospira	Thalassospira	GWHDPGO00000000
SA065	12	598036	2925948	450592	6543	2825	1216	Actinobacteriota	Actinomycetia	Actinomycetales	Microbacteriaceae	Microbacterium	--	GWHDPGP00000000
SA066	29	1054764	4891406	702609	6091	4561	1903	Proteobacteria	Alphaproteobacteria	Rhizobiales	Rhizobiaceae	Hoeflea	--	GWHDPGQ00000000
SA067	27	509036	4503341	356283	6222	4248	1824	Proteobacteria	Alphaproteobacteria	Rhizobiales	Rhizobiaceae	Nitratireductor	Nitratireductor	GWHDPGR00000000
SA068	45	558363	4394342	287231	6047	4070	2010	Proteobacteria	Gammaproteobacteria	Pseudomonadales	Pseudomonadaceae	Pseudomonas_A	Pseudomonas_A	GWHDPGS00000000
SA069	32	815054	3090251	251768	3249	2823	1077	Bacteroidota	Bacteroidia	Flavobacteriales	Flavobacteriaceae	Mangrovimonas	--	GWHDPGT00000000
SA070	31	1406780	3296461	787984	4326	3137	1588	Proteobacteria	Gammaproteobacteria	Nitrosococcales	Methylophagaceae	Methylophaga	--	GWHDPGU00000000
SA071	21	1170254	5498188	658506	5296	4847	1951	Proteobacteria	Alphaproteobacteria	Rhodospirillales	Thalassospiraceae	Thalassospira	Thalassospira	GWHDPGV00000000
SA072	22	769318	4318898	336662	6012	4031	1837	Proteobacteria	Gammaproteobacteria	Burkholderiales	Burkholderiaceae	Pusillimonas_B	--	GWHDPGW00000000
SA073	133	241040	4089402	68435	3788	3876	1073	Bdellovibrionota	Bacteriovoracia	Bacteriovoracales	Bacteriovoracaceae	DB6-IX	--	GWHDPGX00000000
SA074	57	721522	3574645	431273	5969	3501	1602	Proteobacteria	Alphaproteobacteria	Rhodobacterales	Rhodobacteraceae	Celeribacter	--	GWHDPGY00000000
SA075	55	310557	3296112	179783	4366	3095	1573	Proteobacteria	Gammaproteobacteria	Nitrosococcales	Methylophagaceae	Methylophaga	Methylophaga	GWHDPGZ00000000
SA076	4	998610	2748264	846728	3120	2523	1067	Bacteroidota	Bacteroidia	Flavobacteriales	Flavobacteriaceae	Polaribacter_A	--	GWHDPHA00000000
SA077	70	466622	5186806	140082	4262	4630	2261	Proteobacteria	Gammaproteobacteria	Enterobacterales	Vibrionaceae	Vibrio	--	GWHDPHB00000000
SA078	18	713265	3584959	363268	3598	3535	1167	Bdellovibrionota	Bacteriovoracia	Bacteriovoracales	Bacteriovoracaceae	Halobacteriovorax	Halobacteriovorax	GWHDPHC00000000
SA079	30	1102865	6424490	474119	5573	4919	1177	Verrucomicrobiota	Verrucomicrobiae	Verrucomicrobiales	DEV007	Arctic95D-9	--	GWHDPHD00000000
SA080	8	913042	3396283	831838	5822	3312	1548	Proteobacteria	Alphaproteobacteria	Rhizobiales	Devosiaceae	--	--	GWHDPHE00000000
SA081	86	187704	4297838	74906	6283	3875	1998	Proteobacteria	Gammaproteobacteria	Pseudomonadales	Pseudomonadaceae	Pseudomonas_A	Pseudomonas_A	GWHDPHF00000000
SA082	69	1167052	3257749	370536	4648	3042	1600	Proteobacteria	Gammaproteobacteria	Enterobacterales	Alteromonadaceae	Idiomarina	Idiomarina	GWHDPHG00000000
SA083	55	301761	4288385	139013	5438	3884	1808	Proteobacteria	Gammaproteobacteria	Pseudomonadales	Oleiphilaceae	Marinobacter	--	GWHDPHH00000000
SA084	51	657732	4255822	265667	4497	3913	1822	Proteobacteria	Gammaproteobacteria	Pseudomonadales	Marinomonadaceae	Marinomonas	Marinomonas	GWHDPHI00000000
SA085	19	661932	4072178	276288	4513	3803	1659	Proteobacteria	Alphaproteobacteria	Kiloniellales	Kiloniellaceae	Kiloniella	--	GWHDPHJ00000000
SA086	109	254154	4183315	112856	4594	3943	1694	Proteobacteria	Gammaproteobacteria	Pseudomonadales	Nitrincolaceae	Neptuniibacter	Neptuniibacter	GWHDPHK00000000
SA087	67	511070	7478608	232887	5805	5481	1406	Planctomycetota	Planctomycetes	Pirellulales	Pirellulaceae	Poly24	Poly24	GWHDPHL00000000
SA088	36	635737	4196879	224384	5825	3874	1850	Proteobacteria	Gammaproteobacteria	Enterobacterales	Gallaecimonadaceae	Gallaecimonas	Gallaecimonas	GWHDPHM00000000
SA089	46	411554	3715454	172383	5825	3513	1714	Proteobacteria	Alphaproteobacteria	Rhodobacterales	Rhodobacteraceae	Celeribacter	Celeribacter	GWHDPHN00000000
SA090	36	552820	3487516	277773	4375	2987	1527	Proteobacteria	Gammaproteobacteria	Pseudomonadales	Moraxellaceae	Psychrobacter	Psychrobacter	GWHDPHO00000000
SA091	53	837986	4608267	164487	4160	4150	1762	Proteobacteria	Gammaproteobacteria	Enterobacterales	Alteromonadaceae	Pseudoalteromonas	Pseudoalteromonas	GWHDPHP00000000
SA092	36	1174221	3947304	278398	4187	3580	2025	Proteobacteria	Gammaproteobacteria	Enterobacterales	Vibrionaceae	Vibrio	Vibrio	GWHDPHQ00000000
SA093	56	633355	3998349	210294	3334	3502	1243	Bacteroidota	Bacteroidia	Flavobacteriales	Flavobacteriaceae	Zunongwangia	--	GWHDPHR00000000
SA094	25	570150	3332907	291413	4071	3167	1101	Bacteroidota	Bacteroidia	Flavobacteriales	Flavobacteriaceae	Aequorivita	Aequorivita	GWHDPHS00000000
SA095	9	902550	3073408	849917	5882	2949	1584	Proteobacteria	Gammaproteobacteria	Burkholderiales	Burkholderiaceae	Castellaniella	--	GWHDPHT00000000
SA096	103	1566753	7206200	357453	5978	6708	2234	Proteobacteria	Alphaproteobacteria	Rhizobiales	Stappiaceae	Roseibium	Roseibium	GWHDPHU00000000
SA097	16	1033631	4696269	457462	5316	4215	1845	Proteobacteria	Alphaproteobacteria	Rhodospirillales	Thalassospiraceae	Thalassospira	Thalassospira	GWHDPHV00000000
SA098	19	865949	3705605	287472	5696	3594	1663	Proteobacteria	Alphaproteobacteria	Rhodobacterales	Rhodobacteraceae	Celeribacter	--	GWHDPHW00000000
SA099	16	984008	3212356	456456	4359	3031	1559	Proteobacteria	Gammaproteobacteria	Nitrosococcales	Methylophagaceae	Methylophaga	Methylophaga	GWHDPHX00000000
SA100	24	502125	2922916	273721	6942	2738	1271	Actinobacteriota	Actinomycetia	Actinomycetales	Microbacteriaceae	Microbacterium	Microbacterium	GWHDPHY00000000
SA101	13	889413	3345137	506202	6873	2978	1512	Proteobacteria	Gammaproteobacteria	Xanthomonadales	Xanthomonadaceae	Luteimonas	Luteimonas	GWHDPHZ00000000
SA102	26	457891	3553671	197859	5832	3306	1613	Proteobacteria	Gammaproteobacteria	Pseudomonadales	Alcanivoracaceae	Alcanivorax	Alcanivorax	GWHDPIA00000000
SA103	75	397707	4263925	135810	5806	4061	1768	Proteobacteria	Alphaproteobacteria	Rhodobacterales	Rhodobacteraceae	Celeribacter	Celeribacter	GWHDPIB00000000
SA104	21	658486	3288335	455585	6831	3137	1315	Actinobacteriota	Actinomycetia	Actinomycetales	Microbacteriaceae	Microbacterium	--	GWHDPIC00000000
SA105	12	1377355	3744134	619125	6771	3330	1659	Proteobacteria	Gammaproteobacteria	Xanthomonadales	Rhodanobacteraceae	Rhodanobacter	Rhodanobacter	GWHDPID00000000
SA106	21	685203	2494918	199154	3130	2300	996	Bacteroidota	Bacteroidia	Flavobacteriales	Weeksellaceae	Kaistella	--	GWHDPIE00000000
SA107	109	310955	4133617	100088	5863	4067	1643	Proteobacteria	Alphaproteobacteria	Rhodobacterales	Rhodobacteraceae	Celeribacter	--	GWHDPIF00000000
SA108	15	701920	3078759	517149	6409	2931	1395	Proteobacteria	Alphaproteobacteria	Caulobacterales	Maricaulaceae	Maricaulis	--	GWHDPIG00000000
SA109	89	276637	3992530	84865	4617	3687	1756	Proteobacteria	Gammaproteobacteria	Pseudomonadales	Marinomonadaceae	Marinomonas	Marinomonas	GWHDPIH00000000
SA110	7	1384091	2470812	1384091	4880	2314	1351	Proteobacteria	Gammaproteobacteria	Enterobacterales	Alteromonadaceae	Pseudidiomarina	Pseudidiomarina	GWHDPII00000000
SA111	110	243214	3768666	84346	3151	3349	1097	Bacteroidota	Bacteroidia	Flavobacteriales	Flavobacteriaceae	Mesoflavibacter	Mesoflavibacter	GWHDPIJ00000000
SA112	34	227644	2556403	106847	5050	2381	1366	Proteobacteria	Gammaproteobacteria	Enterobacterales	Alteromonadaceae	Pseudidiomarina	Pseudidiomarina	GWHDPIK00000000
SA113	108	420027	7105917	98726	5826	5184	1335	Planctomycetota	Planctomycetes	Pirellulales	Pirellulaceae	Poly24	Poly24	GWHDPIL00000000
SA114	59	682444	4511967	187084	5895	4281	1849	Proteobacteria	Alphaproteobacteria	Rhodobacterales	Rhodobacteraceae	Epibacterium	Epibacterium	GWHDPIM00000000
SA115	15	734975	4104658	549340	5715	3763	1907	Proteobacteria	Gammaproteobacteria	Pseudomonadales	Oleiphilaceae	Marinobacter	--	GWHDPIN00000000
SA116	46	615196	3940121	339718	5790	3725	1720	Proteobacteria	Alphaproteobacteria	Rhodobacterales	Rhodobacteraceae	Celeribacter	Celeribacter	GWHDPIO00000000
SA117	39	1150883	3817399	398411	3583	3298	1142	Bacteroidota	Bacteroidia	Flavobacteriales	Flavobacteriaceae	Winogradskyella	Winogradskyella	GWHDPIP00000000
SA118	27	741950	4613915	374958	6196	4385	1865	Proteobacteria	Alphaproteobacteria	Rhizobiales	Rhizobiaceae	Nitratireductor	Nitratireductor	GWHDPIQ00000000
SA119	14	1330703	3400624	407388	6879	3307	1296	Actinobacteriota	Actinomycetia	Actinomycetales	Microbacteriaceae	Microbacterium	--	GWHDPIR00000000
SA120	61	1361283	6311298	495195	5339	5841	2858	Proteobacteria	Gammaproteobacteria	Enterobacterales	Enterobacteriaceae	Klebsiella_A	Klebsiella_A	GWHDPIS00000000
SA121	16	656007	3614960	550469	4335	3342	1389	Firmicutes	Bacilli	Lactobacillales	Enterococcaceae	Enterococcus_D	Enterococcus_D	GWHDPIT00000000
SA122	34	485522	3601683	177551	6979	3289	1335	Actinobacteriota	Actinomycetia	Actinomycetales	Microbacteriaceae	Microbacterium	--	GWHDPIU00000000
SA123	101	359289	4658978	97052	5492	4524	2486	Proteobacteria	Gammaproteobacteria	Enterobacterales	Enterobacteriaceae	Leclercia	Leclercia	GWHDPIV00000000
SA124	28	428489	3410157	236937	5927	3215	1348	Actinobacteriota	Actinomycetia	Actinomycetales	Micrococcaceae	Glutamicibacter	Glutamicibacter	GWHDPIW00000000
SA125	28	722802	3702218	263594	4087	3347	1928	Proteobacteria	Gammaproteobacteria	Enterobacterales	Vibrionaceae	Vibrio	--	GWHDPIX00000000
SA126	70	517161	4357036	239492	6391	4068	1435	Actinobacteriota	Actinomycetia	Actinomycetales	Micrococcaceae	Glutamicibacter	Glutamicibacter	GWHDPIY00000000
SA127	30	534705	3634058	308857	5831	3441	1665	Proteobacteria	Alphaproteobacteria	Rhodobacterales	Rhodobacteraceae	Celeribacter	Celeribacter	GWHDPIZ00000000
SA128	18	495405	2812470	262130	3256	2605	1017	Bacteroidota	Bacteroidia	Flavobacteriales	Flavobacteriaceae	Mangrovimonas	--	GWHDPJA00000000
SA129	9	855011	3722890	665537	4158	3538	1052	Bdellovibrionota	Bacteriovoracia	Bacteriovoracales	Bacteriovoracaceae	GCA-2712005	--	GWHDPJB00000000
SA130	12	1926487	3310224	1926487	5410	3003	1428	Proteobacteria	Alphaproteobacteria	Sphingomonadales	Emcibacteraceae	Emcibacter	--	GWHDPJC00000000
SA131	139	818252	5529550	211127	5831	5239	1953	Proteobacteria	Alphaproteobacteria	Rhodobacterales	Rhodobacteraceae	Epibacterium	Epibacterium	GWHDPJD00000000
SA132	33	1125264	6388851	475420	5584	4865	1186	Verrucomicrobiota	Verrucomicrobiae	Verrucomicrobiales	DEV007	Arctic95D-9	--	GWHDPJE00000000
SA133	58	464481	4042895	314840	4546	3761	1812	Proteobacteria	Gammaproteobacteria	Pseudomonadales	Nitrincolaceae	Neptunomonas	Neptunomonas	GWHDPJF00000000
SA134	20	585354	3004639	415023	4350	2840	1541	Proteobacteria	Gammaproteobacteria	Nitrosococcales	Methylophagaceae	Methylophaga	Methylophaga	GWHDPJG00000000
SA135	51	259941	2954554	92778	3971	2742	1036	Bacteroidota	Bacteroidia	Flavobacteriales	Flavobacteriaceae	Aequorivita	Aequorivita	GWHDPJH00000000
SA136	78	234621	2884474	49784	6284	2732	1306	Proteobacteria	Alphaproteobacteria	Caulobacterales	Maricaulaceae	Maricaulis	--	GWHDPJI00000000

## Sheet: Table_S6
Extended data Table 6 Taxonomic affiliation of MAGs within the four clusters in the coexistence analysis.
Cluster	MAG	Phylum/Class	Family	Genus
Cluster1	AL013	Gammaproteobacteria	Vibrionaceae	Vibrio
	AL054	Gammaproteobacteria	Methylophagaceae	Methylophaga
	SA070	Gammaproteobacteria	Methylophagaceae	Methylophaga
	SA099	Gammaproteobacteria	Methylophagaceae	Methylophaga
	SA134	Gammaproteobacteria	Methylophagaceae	Methylophaga
	AL009	Alphaproteobacteria	Rhodobacteraceae	Celeribacter
	OA036	Gammaproteobacteria	Kangiellaceae	Kangiella
	AA020	Gammaproteobacteria	Halomonadaceae	Oceanospirillum
	SA086	Gammaproteobacteria	Nitrincolaceae	Neptuniibacter
	AL078	Gammaproteobacteria	Nitrincolaceae	Neptuniibacter
	SA133	Gammaproteobacteria	Nitrincolaceae	Neptunomonas
	OA064	Gammaproteobacteria	Marinomonadaceae	Marinomonas
	SA084	Gammaproteobacteria	Marinomonadaceae	Marinomonas
	AL007	Gammaproteobacteria	Burkholderiaceae	Achromobacter
	AL046	Gammaproteobacteria	Alteromonadaceae	Idiomarina
	SA109	Gammaproteobacteria	Marinomonadaceae	Marinomonas
	SA063	Gammaproteobacteria	Marinomonadaceae	Marinomonas
	AA042	Alphaproteobacteria	Rhizobiaceae	Nitratireductor
	AL001	Alphaproteobacteria	Rhodobacteraceae	Thioclava
	OA097	Gammaproteobacteria	Marinomonadaceae	Marinomonas
	SA093	Bacteroidota	Flavobacteriaceae	Zunongwangia
	AA052	Gammaproteobacteria	Moraxellaceae	Acinetobacter
	AL052	Gammaproteobacteria	Moraxellaceae	Psychrobacter
	AL109	Actinobacteriota	Micrococcaceae	Arthrobacter_H
	OA120	Gammaproteobacteria	Vibrionaceae	Vibrio
	AL014	Alphaproteobacteria	Thalassospiraceae	Thalassospira
	OA007	Gammaproteobacteria	Vibrionaceae	Vibrio
	AL041	Alphaproteobacteria	Terasakiellaceae	Terasakiella
	AA101	Bacteroidota	Crocinitomicaceae	UBA6165
	OA118	Gammaproteobacteria	Alteromonadaceae	Pseudoalteromonas
	SA075	Gammaproteobacteria	Methylophagaceae	Methylophaga
	SA091	Gammaproteobacteria	Alteromonadaceae	Pseudoalteromonas
	SA121	Firmicutes	Enterococcaceae	Enterococcus_D
	AA043	Gammaproteobacteria	Alteromonadaceae	Pseudidiomarina
	AL105	Bacteroidota	Flavobacteriaceae	Galbibacter
	OA010	Gammaproteobacteria	Shewanellaceae	Shewanella
	SA090	Gammaproteobacteria	Moraxellaceae	Psychrobacter
	AL018	Alphaproteobacteria	Emcibacteraceae	--
	AL089	Alphaproteobacteria	Thalassospiraceae	Thalassospira
	AL079	Gammaproteobacteria	Oleiphilaceae	PZPK01
	AL036	Gammaproteobacteria	Alteromonadaceae	Thalassotalea_C
	OA026	Gammaproteobacteria	Psychromonadaceae	Psychromonas
	SA092	Gammaproteobacteria	Vibrionaceae	Vibrio
	SA125	Gammaproteobacteria	Vibrionaceae	Vibrio
	OA117	Gammaproteobacteria	Vibrionaceae	Vibrio
	SA077	Gammaproteobacteria	Vibrionaceae	Vibrio
	SA082	Gammaproteobacteria	Alteromonadaceae	Idiomarina
	AL064	Verrucomicrobiota	Opitutaceae	Cephaloticoccus
	AL080	Gammaproteobacteria	Alteromonadaceae	Neptunicella
	AA091	Bacteroidota	Marinifilaceae	Ancylomarina
	AL040	Bacteroidota	Chitinophagaceae	Edaphocola
	SA060	Gammaproteobacteria	Alteromonadaceae	Idiomarina
	AL006	Bacteroidota	Flavobacteriaceae	Mesonia
	AA071	Gammaproteobacteria	Kangiellaceae	Kangiella
	AA145	Planctomycetota	Planctomycetaceae	Gimesia
	AL075	Bacteroidota	UBA2268	PGYR01
	AA021	Planctomycetota	Planctomycetaceae	KOR42
	AA024	Planctomycetota	Planctomycetaceae	KOR42
	AA123	Gammaproteobacteria	Nitrincolaceae	Neptunomonas
	AL030	Alphaproteobacteria	Stappiaceae	Stappia
	OA028	Campylobacterota	Arcobacteraceae	Halarcobacter
	AL034	Gammaproteobacteria	Nitrincolaceae	Marinobacterium
	AL113	Alphaproteobacteria	Maricaulaceae	Maricaulis
	AA005	Gammaproteobacteria	Oleiphilaceae	Marinobacter
	AL096	Alphaproteobacteria	Hyphomonadaceae	Henriciella
	AL101	Gammaproteobacteria	Alteromonadaceae	Pseudidiomarina
	AA099	Gammaproteobacteria	Alteromonadaceae	Idiomarina
	AL099	Alphaproteobacteria	Maricaulaceae	Maricaulis
	AL061	Bdellovibrionota	Bacteriovoracaceae	GCA-2712005
	OA095	Gammaproteobacteria	Alteromonadaceae	Pseudidiomarina
	SA023	Gammaproteobacteria	Alteromonadaceae	Idiomarina
	OA067	Gammaproteobacteria	Alteromonadaceae	Idiomarina
	AL048	Alphaproteobacteria	Rhodobacteraceae	Celeribacter
	OA014	Gammaproteobacteria	Alteromonadaceae	Idiomarina
	OA027	Gammaproteobacteria	Alteromonadaceae	Idiomarina
	AA040	Gammaproteobacteria	Pseudomonadaceae	Pseudomonas_A
	AA142	Alphaproteobacteria	Maricaulaceae	Maricaulis
	OA045	Gammaproteobacteria	Alteromonadaceae	Pseudidiomarina
	AA055	Bacteroidota	Schleiferiaceae	Owenweeksia
	SA112	Gammaproteobacteria	Alteromonadaceae	Pseudidiomarina
	AA032	Alphaproteobacteria	Rhizobiaceae	Nitratireductor
	AA118	Gammaproteobacteria	Pseudomonadaceae	Pseudomonas_D
	AL026	Bacteroidota	Schleiferiaceae	Owenweeksia
	AL094	Alphaproteobacteria	Rhodobacteraceae	Epibacterium
	SA061	Planctomycetota	Planctomycetaceae	Gimesia
	AA134	Planctomycetota	Planctomycetaceae	Gimesia
	OA112	Planctomycetota	Planctomycetaceae	Gimesia
	AA143	Verrucomicrobiota	DEV007	JABDJT01
	SA087	Planctomycetota	Pirellulaceae	Poly24
	OA060	Bdellovibrionota	Bacteriovoracaceae	--
	AA078	Alphaproteobacteria	Rhodobacteraceae	Pseudodonghicola
	AL071	Planctomycetota	Pirellulaceae	Poly24
	SA113	Planctomycetota	Pirellulaceae	Poly24
	AA067	Planctomycetota	Pirellulaceae	Poly24
	OA062	Planctomycetota	Pirellulaceae	Poly24
	OA111	Gammaproteobacteria	Alteromonadaceae	Idiomarina
	AA013	Gammaproteobacteria	Alcanivoracaceae	Alcanivorax
	AA130	Gammaproteobacteria	Alteromonadaceae	Pseudidiomarina
	AA082	Planctomycetota	Pirellulaceae	Poly24
	SA110	Gammaproteobacteria	Alteromonadaceae	Pseudidiomarina
	AA114	Alphaproteobacteria	Kordiimonadaceae	Kordiimonas
	SA033	Desulfobacterota	Desulfocapsaceae	Desulfopila
	AA006	Bacteroidota	Flavobacteriaceae	Muricauda
	OA047	Gammaproteobacteria	Halomonadaceae	Oceanospirillum
	OA106	Gammaproteobacteria	Nitrincolaceae	Marinobacterium
	AL070	Gammaproteobacteria	Nitrincolaceae	Amphritea
	AA098	Gammaproteobacteria	Halomonadaceae	Oceanospirillum
	OA081	Gammaproteobacteria	Halomonadaceae	Oceanospirillum
	AL115	Planctomycetota	Planctomycetaceae	KOR42
	OA032	Gammaproteobacteria	Halomonadaceae	Oceanospirillum
	OA053	Alphaproteobacteria	Rhodobacteraceae	Pseudophaeobacter_A
Cluster2	SA118	Alphaproteobacteria	Rhizobiaceae	Nitratireductor
	OA004	Alphaproteobacteria	Rhizobiaceae	Nitratireductor
	AA033	Gammaproteobacteria	Pseudomonadaceae	Pseudomonas_E
	AA073	Alphaproteobacteria	Rhizobiaceae	Nitratireductor
	AL085	Bdellovibrionota	Bacteriovoracaceae	GCA-2706205
	AA039	Gammaproteobacteria	Marinomonadaceae	Marinomonas
	OA102	Alphaproteobacteria	Rhizobiaceae	Nitratireductor
	SA067	Alphaproteobacteria	Rhizobiaceae	Nitratireductor
	AA144	Bdellovibrionota	Bacteriovoracaceae	DB6-IX
	AL044	Alphaproteobacteria	Maricaulaceae	Maricaulis
	AA068	Alphaproteobacteria	Maricaulaceae	Maricaulis
	SA047	Alphaproteobacteria	Maricaulaceae	Maricaulis
	AA125	Alphaproteobacteria	Caulobacteraceae	Brevundimonas
	SA029	Alphaproteobacteria	Devosiaceae	Devosia_A
	AL047	Bacteroidota	Flavobacteriaceae	Mangrovimonas
	AL100	Alphaproteobacteria	Kordiimonadaceae	Kordiimonas
	OA092	Alphaproteobacteria	Minwuiaceae	Minwuia
	SA012	Alphaproteobacteria	Stappiaceae	Roseibium
	SA025	Alphaproteobacteria	Stappiaceae	Roseibium
	AL027	Alphaproteobacteria	Stappiaceae	Roseibium
	SA019	Alphaproteobacteria	Stappiaceae	Stappia
	AA084	Alphaproteobacteria	Thalassospiraceae	Thalassospira
	SA041	Alphaproteobacteria	Sphingomonadaceae	Erythrobacter_A
	AA077	Bacteroidota	Cyclobacteriaceae	Cyclobacterium
	OA090	Alphaproteobacteria	Sphingomonadaceae	Erythrobacter_A
	AA053	Alphaproteobacteria	Kiloniellaceae	WHTV01
	AL023	Bacteroidota	Flavobacteriaceae	Galbibacter
	AL045	Alphaproteobacteria	Minwuiaceae	--
	SA032	Alphaproteobacteria	Stappiaceae	Roseibium
	SA048	Alphaproteobacteria	Stappiaceae	Roseibium
	SA002	Alphaproteobacteria	Casp-alpha2	JABMNT01
	SA011	Alphaproteobacteria	Casp-alpha2	JABMNT01
	SA130	Alphaproteobacteria	Emcibacteraceae	Emcibacter
	AA004	Bacteroidota	Flavobacteriaceae	Gelidibacter
	OA069	Alphaproteobacteria	Kordiimonadaceae	Kordiimonas
	AA086	Firmicutes	Acholeplasmataceae	MZ-XQ
	OA038	Alphaproteobacteria	Kordiimonadaceae	Kordiimonas
	SA004	Alphaproteobacteria	Kordiimonadaceae	Kordiimonas
	AL068	Alphaproteobacteria	Kordiimonadaceae	Kordiimonas
	SA058	Alphaproteobacteria	Kordiimonadaceae	Kordiimonas
	AA126	Alphaproteobacteria	Devosiaceae	DROE01
	OA091	Alphaproteobacteria	Casp-alpha2	UBA1479
	OA098	Alphaproteobacteria	Casp-alpha2	UBA1479
	OA065	Alphaproteobacteria	Emcibacteraceae	Emcibacter_A
	AA138	Alphaproteobacteria	Rhodobacteraceae	Pararhodobacter
	OA109	Alphaproteobacteria	HT1-32	HT1-32
	OA056	Alphaproteobacteria	Devosiaceae	Pelagibacterium
	AL020	Gammaproteobacteria	Oleiphilaceae	Marinobacter
	SA116	Alphaproteobacteria	Rhodobacteraceae	Celeribacter
	SA074	Alphaproteobacteria	Rhodobacteraceae	Celeribacter
	AL031	Alphaproteobacteria	Rhodobacteraceae	Maritimibacter
	SA098	Alphaproteobacteria	Rhodobacteraceae	Celeribacter
	SA103	Alphaproteobacteria	Rhodobacteraceae	Celeribacter
	OA107	Alphaproteobacteria	Rhodobacteraceae	Celeribacter
	AA012	Campylobacterota	Sulfurimonadaceae	GCA-2733885
	AL019	Gammaproteobacteria	Aeromonadaceae	Oceanimonas
	SA028	Alphaproteobacteria	Rhodobacteraceae	Celeribacter
	SA107	Alphaproteobacteria	Rhodobacteraceae	Celeribacter
	SA052	Alphaproteobacteria	Rhodobacteraceae	Celeribacter
	AL051	Alphaproteobacteria	Rhodobacteraceae	--
	AL008	Gammaproteobacteria	Marinomonadaceae	Marinomonas
	SA127	Alphaproteobacteria	Rhodobacteraceae	Celeribacter
	AL123	Bacteroidota	Flavobacteriaceae	Joostella
	SA089	Alphaproteobacteria	Rhodobacteraceae	Celeribacter
	OA055	Alphaproteobacteria	Rhodobacteraceae	--
	SA017	Alphaproteobacteria	Rhodobacteraceae	--
	AL050	Alphaproteobacteria	Emcibacteraceae	--
	AA037	Bacteroidota	Flavobacteriaceae	Tenacibaculum
	OA122	Alphaproteobacteria	Rhodobacteraceae	--
	AL028	Gammaproteobacteria	Pseudomonadaceae	Pseudomonas_A
	SA007	Alphaproteobacteria	Rhodobacteraceae	Rhodobacter_B
	AA009	Gammaproteobacteria	Halomonadaceae	Oceanospirillum
	AA121	Alphaproteobacteria	Rhodobacteraceae	Pararhodobacter
	AA137	Bacteroidota	UBA2268	PGYR01
	OA054	Gammaproteobacteria	Nitrincolaceae	Motiliproteus
	OA113	Alphaproteobacteria	Rhodobacteraceae	Leisingera
	OA114	Alphaproteobacteria	Rhodobacteraceae	Roseovarius
	OA100	Alphaproteobacteria	Rhodobacteraceae	Marinovum
	OA115	Alphaproteobacteria	Rhodobacteraceae	Sulfitobacter
	SA040	Alphaproteobacteria	Rhodobacteraceae	UBA3069
	AA066	Alphaproteobacteria	Rhodobacteraceae	Primorskyibacter
	SA008	Alphaproteobacteria	Rhodobacteraceae	Roseovarius
	AA060	Alphaproteobacteria	Rhodobacteraceae	Epibacterium
	AL003	Gammaproteobacteria	Methylophagaceae	Methylophaga
	SA003	Alphaproteobacteria	Rhodobacteraceae	Salipiger
	SA051	Alphaproteobacteria	Rhodobacteraceae	Salipiger
	AA041	Gammaproteobacteria	Burkholderiaceae	Pusillimonas_A
	SA026	Alphaproteobacteria	Rhodobacteraceae	Salipiger
	AL069	Alphaproteobacteria	Rhodobacteraceae	AWRV01
	OA101	Alphaproteobacteria	Rhodobacteraceae	AWRV01
	AA081	Campylobacterota	Arcobacteraceae	Poseidonibacter
	SA043	Alphaproteobacteria	Rhodobacteraceae	AWRV01
	OA058	Alphaproteobacteria	Rhodobacteraceae	Roseovarius
	OA119	Alphaproteobacteria	Rhodobacteraceae	CAU-1492
	SA005	Alphaproteobacteria	Rhodobacteraceae	Antarctobacter
	SA131	Alphaproteobacteria	Rhodobacteraceae	Epibacterium
	SA114	Alphaproteobacteria	Rhodobacteraceae	Epibacterium
	AL114	Bacteroidota	Flavobacteriaceae	Mangrovimonas
	AL056	Bacteroidota	Flavobacteriaceae	Aequorivita
	AA031	Alphaproteobacteria	Rhodobacteraceae	Epibacterium
	AA058	Bacteroidota	Flavobacteriaceae	Aequorivita
	AA069	Alphaproteobacteria	Rhodobacteraceae	Epibacterium
	OA041	Alphaproteobacteria	Rhodobacteraceae	Epibacterium
	OA013	Alphaproteobacteria	Rhodobacteraceae	--
	AA119	Alphaproteobacteria	Rhodobacteraceae	Epibacterium
	AA072	Alphaproteobacteria	Rhodobacteraceae	Epibacterium
	AA102	Alphaproteobacteria	Sphingomonadaceae	Parasphingorhabdus
	AA015	Alphaproteobacteria	Rhodobacteraceae	Pseudophaeobacter
	AL095	Gammaproteobacteria	Alteromonadaceae	Pseudidiomarina
	AA140	Alphaproteobacteria	Rhodobacteraceae	Pseudophaeobacter
	OA029	Alphaproteobacteria	Rhodobacteraceae	--
	OA002	Alphaproteobacteria	Rhodobacteraceae	--
	AA057	Gammaproteobacteria	Alteromonadaceae	Pseudidiomarina
	AL083	Alphaproteobacteria	Rhizobiaceae	Hoeflea
	OA088	Alphaproteobacteria	Devosiaceae	--
	AA117	Alphaproteobacteria	Thalassospiraceae	Thalassospira
	SA018	Alphaproteobacteria	Devosiaceae	DROE01
	AA139	Alphaproteobacteria	HT1-32	HT1-32
	SA001	Alphaproteobacteria	Devosiaceae	--
	SA080	Alphaproteobacteria	Devosiaceae	--
	AL035	Planctomycetota	Planctomycetaceae	KOR42
	SA035	Alphaproteobacteria	Rhizobiaceae	Hoeflea
	AA001	Alphaproteobacteria	Rhizobiaceae	Hoeflea
	SA066	Alphaproteobacteria	Rhizobiaceae	Hoeflea
	AL017	Gammaproteobacteria	Pseudomonadaceae	Pseudomonas_C
	AL059	Gammaproteobacteria	Oleiphilaceae	Marinobacter
	AL086	Alphaproteobacteria	Rhizobiaceae	Nitratireductor
	OA043	Alphaproteobacteria	Stappiaceae	--
	OA124	Alphaproteobacteria	Rhodobacteraceae	Amylibacter
	AL092	Actinobacteriota	Microbacteriaceae	Microbacterium
	AL093	Actinobacteriota	Micrococcaceae	Arthrobacter_H
	AL024	Actinobacteriota	Mycobacteriaceae	Corynebacterium
	SA101	Gammaproteobacteria	Xanthomonadaceae	Luteimonas
	SA096	Alphaproteobacteria	Stappiaceae	Roseibium
	AA061	Gammaproteobacteria	Shewanellaceae	Shewanella
	AL088	Gammaproteobacteria	Moraxellaceae	Psychrobacter
	SA126	Actinobacteriota	Micrococcaceae	Glutamicibacter
	AL108	Actinobacteriota	Mycobacteriaceae	Corynebacterium
	AL122	Gammaproteobacteria	Halomonadaceae	Halomonas
	AL107	Actinobacteriota	Microbacteriaceae	Microbacterium
	SA124	Actinobacteriota	Micrococcaceae	Glutamicibacter
	AA113	Alphaproteobacteria	Devosiaceae	DROE01
	SA049	Actinobacteriota	Microbacteriaceae	Microbacterium
	SA122	Actinobacteriota	Microbacteriaceae	Microbacterium
	SA119	Actinobacteriota	Microbacteriaceae	Microbacterium
	AL106	Gammaproteobacteria	Shewanellaceae	Shewanella
	SA065	Actinobacteriota	Microbacteriaceae	Microbacterium
	SA100	Actinobacteriota	Microbacteriaceae	Microbacterium
	SA104	Actinobacteriota	Microbacteriaceae	Microbacterium
	AL005	Gammaproteobacteria	Marinomonadaceae	Marinomonas
	OA094	Gammaproteobacteria	Burkholderiaceae	Achromobacter
	SA053	Gammaproteobacteria	Rhodanobacteraceae	Rhodanobacter
	SA105	Gammaproteobacteria	Rhodanobacteraceae	Rhodanobacter
	AA016	Gammaproteobacteria	Burkholderiaceae	Pusillimonas_B
	AL110	Gammaproteobacteria	Vibrionaceae	Vibrio
	SA072	Gammaproteobacteria	Burkholderiaceae	Pusillimonas_B
	SA095	Gammaproteobacteria	Burkholderiaceae	Castellaniella
	OA082	Spirochaetota	Sphaerochaetaceae	Sphaerochaeta
	AA047	Gammaproteobacteria	Aeromonadaceae	Oceanisphaera
	AL087	Gammaproteobacteria	Burkholderiaceae	Pusillimonas_B
	OA008	Gammaproteobacteria	Halomonadaceae	Cobetia
	OA099	Gammaproteobacteria	Halomonadaceae	Halomonas
Cluster3	OA083	Firmicutes_A	Filifactoraceae	Acetoanaerobium
	AA087	Campylobacterota	Arcobacteraceae	Halarcobacter
	OA052	Campylobacterota	Arcobacteraceae	Poseidonibacter
	SA078	Bdellovibrionota	Bacteriovoracaceae	Halobacteriovorax
	AL072	Bacteroidota	Flavobacteriaceae	Winogradskyella
	OA033	Bdellovibrionota	Bacteriovoracaceae	DB6-IX
	AA128	Bdellovibrionota	Bacteriovoracaceae	--
	OA030	Bdellovibrionota	Bacteriovoracaceae	GCA-2712005
	SA129	Bdellovibrionota	Bacteriovoracaceae	GCA-2712005
	AA141	Gammaproteobacteria	Alteromonadaceae	Pseudidiomarina
	SA073	Bdellovibrionota	Bacteriovoracaceae	DB6-IX
	AA075	Alphaproteobacteria	Sphingomonadaceae	Erythrobacter_A
	AA149	Bdellovibrionota	Bacteriovoracaceae	GCA-2712005
	AA065	Bacteroidota	Flavobacteriaceae	Aequorivita
	AL032	Bacteroidota	Crocinitomicaceae	Brumimicrobium
	AL076	Bacteroidota	Schleiferiaceae	Owenweeksia
	AA100	Alphaproteobacteria	Rhodobacteraceae	Epibacterium
	OA003	Bacteroidota	Schleiferiaceae	Owenweeksia
	OA104	Bacteroidota	Schleiferiaceae	Owenweeksia
	AA080	Bdellovibrionota	Bacteriovoracaceae	GCA-2712005
	AL065	Gammaproteobacteria	Porticoccaceae	Porticoccus
	AA096	Alphaproteobacteria	Thalassospiraceae	Thalassospira
	SA036	Campylobacterota	Arcobacteraceae	Halarcobacter
	AA030	Bacteroidota	Flavobacteriaceae	Bizionia
	AA090	Alphaproteobacteria	Terasakiellaceae	Terasakiella
	AA109	Bacteroidota	Balneolaceae	Balneola
	AA095	Campylobacterota	Arcobacteraceae	Poseidonibacter
	OA001	Bacteroidota	Balneolaceae	Balneola
	AA076	Bacteroidota	Marinifilaceae	Ancylomarina
	AA124	Bacteroidota	Balneolaceae	Balneola
	AA002	Campylobacterota	Arcobacteraceae	Halarcobacter
	AA034	Alphaproteobacteria	Rhodobacteraceae	--
	OA039	Bacteroidota	Flavobacteriaceae	Tenacibaculum
	AA028	Bacteroidota	Flavobacteriaceae	Polaribacter_A
	SA059	Bacteroidota	Flavobacteriaceae	Polaribacter_A
	SA076	Bacteroidota	Flavobacteriaceae	Polaribacter_A
	SA027	Bacteroidota	Schleiferiaceae	Owenweeksia
	AL057	Alphaproteobacteria	Rhizobiaceae	Hoeflea
	OA018	Bdellovibrionota	Bacteriovoracaceae	Halobacteriovorax
	OA046	Campylobacterota	Arcobacteraceae	CAIJNA01
	OA072	Bacteroidota	Flavobacteriaceae	Aequorivita
	AA132	Bacteroidota	Flavobacteriaceae	Aequorivita
	SA045	Bacteroidota	Flavobacteriaceae	Aequorivita
	OA121	Bacteroidota	Flavobacteriaceae	Aequorivita
	OA019	Bacteroidota	Flavobacteriaceae	Aequorivita
	OA080	Bacteroidota	Flavobacteriaceae	Aequorivita
	AL104	Gammaproteobacteria	Burkholderiaceae	Castellaniella
	AL029	Planctomycetota	Planctomycetaceae	Gimesia
	AA070	Bacteroidota	Flavobacteriaceae	Aequorivita
	AA064	Bacteroidota	Flavobacteriaceae	Xanthomarina
	AA107	Bacteroidota	Flavobacteriaceae	Aequorivita
	OA049	Bacteroidota	Flavobacteriaceae	Aequorivita
	AA056	Alphaproteobacteria	Terasakiellaceae	Terasakiella
	AA135	Bacteroidota	Flavobacteriaceae	Aequorivita
	AL074	Bdellovibrionota	Bacteriovoracaceae	Halobacteriovorax
	AL058	Alphaproteobacteria	Maricaulaceae	Maricaulis
	AA106	Bacteroidota	Flavobacteriaceae	Aequorivita
	SA135	Bacteroidota	Flavobacteriaceae	Aequorivita
	OA061	Bacteroidota	Flavobacteriaceae	Aequorivita
	AA029	Bacteroidota	Flavobacteriaceae	Aequorivita
	AA019	Bacteroidota	Flavobacteriaceae	Aequorivita
	AA147	Bacteroidota	Flavobacteriaceae	Aequorivita
	OA074	Bacteroidota	Flavobacteriaceae	Aequorivita
	SA042	Bacteroidota	Flavobacteriaceae	Aequorivita
	AL124	Actinobacteriota	Micrococcaceae	Arthrobacter_H
	SA094	Bacteroidota	Flavobacteriaceae	Aequorivita
	AA112	Bacteroidota	Flavobacteriaceae	Aequorivita
	OA031	Bacteroidota	Flavobacteriaceae	Aequorivita
	AL021	Gammaproteobacteria	Methylophagaceae	Methylophaga
	AL111	Gammaproteobacteria	Burkholderiaceae	Castellaniella
	AA048	Gammaproteobacteria	Pseudomonadaceae	Pseudomonas_D
	AA010	Alphaproteobacteria	Rhodobacteraceae	Pararhodobacter
	SA016	Bacteroidota	Flavobacteriaceae	Muricauda
	AA007	Alphaproteobacteria	Kordiimonadaceae	Kordiimonas
	OA063	Bacteroidota	Flavobacteriaceae	Muricauda
	AA079	Alphaproteobacteria	Kordiimonadaceae	Kordiimonas
	SA009	Bacteroidota	Flavobacteriaceae	Arenibacter
	AA093	Bacteroidota	Flavobacteriaceae	Arenibacter
	AA094	Bacteroidota	Balneolaceae	Balneola
	AA054	Alphaproteobacteria	Rhodobacteraceae	Maritimibacter_A
	AA085	Alphaproteobacteria	Sphingomonadaceae	Erythrobacter_A
	OA089	Firmicutes	Acholeplasmataceae	MZ-XQ
	SA039	Bacteroidota	Balneolaceae	Balneola
	AL102	Gammaproteobacteria	Alteromonadaceae	Pseudidiomarina
	OA059	Bacteroidota	Cyclobacteriaceae	Algoriphagus
	OA073	Bacteroidota	Flavobacteriaceae	Flavobacterium
	AA026	Bacteroidota	Flavobacteriaceae	Flavobacterium
	OA123	Bacteroidota	Flavobacteriaceae	Flavobacterium
	AA088	Gammaproteobacteria	Alteromonadaceae	Neptunicella
	AA025	Bacteroidota	Flavobacteriaceae	Winogradskyella
	AL073	Bacteroidota	Flavobacteriaceae	Aequorivita
	SA015	Bacteroidota	Flavobacteriaceae	Winogradskyella
	SA117	Bacteroidota	Flavobacteriaceae	Winogradskyella
	AA050	Alphaproteobacteria	Maricaulaceae	--
	SA111	Bacteroidota	Flavobacteriaceae	Mesoflavibacter
	AA017	Bacteroidota	Flavobacteriaceae	Mesoflavibacter
	OA017	Bacteroidota	Flavobacteriaceae	Mesoflavibacter
	AL112	Gammaproteobacteria	Nitrincolaceae	Amphritea
	SA069	Bacteroidota	Flavobacteriaceae	Mangrovimonas
	SA128	Bacteroidota	Flavobacteriaceae	Mangrovimonas
	OA079	Bacteroidota	Flavobacteriaceae	Mangrovimonas
	OA116	Bacteroidota	Flavobacteriaceae	Mangrovimonas
	AL049	Gammaproteobacteria	Marinomonadaceae	Marinomonas
	OA050	Bacteroidota	Flavobacteriaceae	Mangrovimonas
	SA010	Bacteroidota	Flavobacteriaceae	Meridianimaribacter
	OA005	Bacteroidota	Flavobacteriaceae	Meridianimaribacter
	OA024	Bacteroidota	Flavobacteriaceae	Meridianimaribacter
	AL084	Gammaproteobacteria	Pseudomonadaceae	Pseudomonas_A
	SA038	Bacteroidota	Flavobacteriaceae	Winogradskyella
	AA062	Myxococcota	Bradymonadaceae	V1718
	AL010	Gammaproteobacteria	Cycloclasticaceae	Cycloclasticus
	AL126	Bacteroidota	Flavobacteriaceae	Aequorivita
	SA057	Bacteroidota	Flavobacteriaceae	Joostella
	AL002	Alphaproteobacteria	Thalassospiraceae	Thalassospira
	SA106	Bacteroidota	Weeksellaceae	Kaistella
	AA104	Gammaproteobacteria	Alteromonadaceae	Pseudoalteromonas
	AA136	Alphaproteobacteria	Devosiaceae	--
	OA021	Bacteroidota	Flavobacteriaceae	Oceanihabitans
	AA092	Bacteroidota	Salibacteraceae	GCA-2705995
	AA108	Bacteroidota	Flavobacteriaceae	Algorimicrobium
	OA034	Bacteroidota	Flavobacteriaceae	Algorimicrobium
	AA148	Bacteroidota	Flavobacteriaceae	Xanthomarina
	OA096	Bacteroidota	Flavobacteriaceae	Xanthomarina
	AA063	Bacteroidota	Flavobacteriaceae	Flaviramulus_A
	AA111	Gammaproteobacteria	Oleiphilaceae	Marinobacter
	SA014	Bacteroidota	Flavobacteriaceae	Xanthomarina
	SA055	Bacteroidota	Flavobacteriaceae	Xanthomarina
	AA023	Bacteroidota	Flavobacteriaceae	Xanthomarina
	SA006	Bacteroidota	Flavobacteriaceae	Xanthomarina
	AL043	Gammaproteobacteria	Spongiibacteraceae	Spongiibacter
	AL055	Bacteroidota	Cyclobacteriaceae	Fulvivirga
Cluster4	OA071	Gammaproteobacteria	Pseudomonadaceae	Pseudomonas_D
	AA051	Bacteroidota	Flavobacteriaceae	Winogradskyella
	AA116	Gammaproteobacteria	Moraxellaceae	Psychrobacter
	OA006	Gammaproteobacteria	Pseudomonadaceae	Pseudomonas_E
	OA009	Gammaproteobacteria	Pseudomonadaceae	Pseudomonas_E
	AA035	Alphaproteobacteria	Sphingomonadaceae	Parasphingorhabdus
	OA011	Gammaproteobacteria	Pseudomonadaceae	Pseudomonas_E
	AA120	Gammaproteobacteria	Pseudomonadaceae	Pseudomonas_E
	AL091	Actinobacteriota	Mycobacteriaceae	Corynebacterium
	AA044	Alphaproteobacteria	Rhodobacteraceae	Salipiger
	AL053	Gammaproteobacteria	Oleiphilaceae	Marinobacter
	AL062	Gammaproteobacteria	Alteromonadaceae	Pseudidiomarina
	SA115	Gammaproteobacteria	Oleiphilaceae	Marinobacter
	AA110	Bacteroidota	Flavobacteriaceae	Xanthomarina
	SA030	Gammaproteobacteria	Oleiphilaceae	Marinobacter
	AA131	Gammaproteobacteria	Nitrincolaceae	Marinobacterium
	AL011	Gammaproteobacteria	Nitrincolaceae	Marinobacterium
	AL033	Gammaproteobacteria	Alteromonadaceae	Pseudidiomarina
	AL042	Gammaproteobacteria	Moraxellaceae	Paraperlucidibaca
	OA025	Gammaproteobacteria	Spongiibacteraceae	Spongiibacter
	AL125	Alphaproteobacteria	Rhodobacteraceae	Celeribacter
	OA020	Gammaproteobacteria	Alcanivoracaceae	Alcanivorax
	SA021	Gammaproteobacteria	Alcanivoracaceae	Alcanivorax
	AA014	Alphaproteobacteria	Maricaulaceae	Maricaulis
	SA102	Gammaproteobacteria	Alcanivoracaceae	Alcanivorax
	AA133	Gammaproteobacteria	Nitrincolaceae	Marinobacterium
	AL012	Gammaproteobacteria	Nitrincolaceae	Marinobacterium_A
	AL016	Alphaproteobacteria	Rhodobacteraceae	Celeribacter
	SA034	Gammaproteobacteria	Oleiphilaceae	Marinobacter
	SA083	Gammaproteobacteria	Oleiphilaceae	Marinobacter
	AA008	Gammaproteobacteria	Alteromonadaceae	Pseudidiomarina
	OA110	Gammaproteobacteria	Oleiphilaceae	Marinobacter
	OA012	Gammaproteobacteria	Pseudomonadaceae	Pseudomonas_A
	SA081	Gammaproteobacteria	Pseudomonadaceae	Pseudomonas_A
	AL082	Alphaproteobacteria	Rhodobacteraceae	--
	AL025	Alphaproteobacteria	Rhodobacteraceae	Celeribacter
	OA057	Gammaproteobacteria	Pseudomonadaceae	Pseudomonas_A
	SA056	Gammaproteobacteria	Pseudomonadaceae	Pseudomonas_A
	OA077	Gammaproteobacteria	Pseudomonadaceae	Pseudomonas_A
	AA045	Gammaproteobacteria	Alteromonadaceae	Rheinheimera
	OA105	Gammaproteobacteria	Pseudomonadaceae	Pseudomonas_A
	OA040	Gammaproteobacteria	Pseudomonadaceae	Pseudomonas_A
	SA068	Gammaproteobacteria	Pseudomonadaceae	Pseudomonas_A
	OA093	Gammaproteobacteria	Halomonadaceae	Halomonas
	SA020	Gammaproteobacteria	Halomonadaceae	Halomonas
	OA085	Gammaproteobacteria	Nitrincolaceae	Nitrincola
	OA087	Gammaproteobacteria	Nitrincolaceae	Marinobacterium
	OA035	Gammaproteobacteria	Nitrincolaceae	Marinobacterium
	SA046	Gammaproteobacteria	Nitrincolaceae	Marinobacterium
	AL022	Alphaproteobacteria	Rhodobacteraceae	Celeribacter
	OA048	Gammaproteobacteria	Pseudomonadaceae	Pseudomonas_C
	AL066	Gammaproteobacteria	Saccharospirillaceae	UBA2009
	AL067	Alphaproteobacteria	Terasakiellaceae	Terasakiella

## Sheet: Table_S7
Extended data Table 7 Information of the 16S rRNA V3-V4 amplicon sequencing of cocultured Roseibium aggregatum S1616 and Leisingera aquaemixtae M597.
Sample name	Raw PE	Raw Tags	Clean Tags	Effective Tags	Base (nt)	Avglen (nt)	Q20	Q30	GC%
0d-1	90157	88491	86728	79647	32405049	407	98.03	93.79	54.55
0d-2	78481	75798	74286	67544	27396782	406	98.06	93.84	54.93
2d-1	87620	86366	84376	75380	30585305	406	97.95	93.62	55.27
2d-2	80469	79415	77795	67959	27603506	406	98.03	93.76	54.87
4d-1	83099	80187	78716	73524	29751568	405	98.15	94.05	55.28
4d-2	86277	83708	82206	77869	31477307	404	98.18	94.1	55.47
6d-1	92038	91204	89581	84609	34051031	402	97.94	93.56	54.65
6d-2	81084	79690	77991	68667	27970041	407	97.97	93.65	54.59
8d-1	86625	84606	83042	75582	30697158	406	98.08	93.89	55.14
8d-2	84588	83944	82223	73129	29551725	404	98.07	93.89	55.57
10d-1	88096	87351	85688	75177	30684108	408	98.08	93.86	54.68
10d-2	80025	77207	75640	67763	27389668	404	98.12	93.93	55.53
12d-1	83879	83665	81957	76292	30842573	404	98.15	94.06	55.51
12d-2	94774	94178	93244	72940	29206880	400	98.59	95.03	55.1
14d-1	69125	66640	65156	60031	24278258	404	98.08	93.91	55.6
14d-2	87252	83628	81984	72459	29279084	404	98.13	93.98	55.56

## Sheet: Table_S8
Extended data Table 8 Information of the complete genomes of S1616 and M597.
Strain name	Total length (bp)	Chromosomes	Plasmids	GC(%)	ORFs	KEGG-annotated ORFs	Data accession in NCBI
S1616	6739401	1	3	58.85	6170	3264	CP128601-CP128604
M597	4391804	1	6	64.68	4130	2393	CP081044-CP081050

## Sheet: Table_S9
Extended data Table 9 Information of the transcriptomes of the cocultured S1616 and M597.
Sample name	Raw Reads	Clean Reads	Raw Base(G)	Clean Base(G)	Q20(%)	Q30(%)	GC(%)	Data accession in CNCB
S1616M597-1	14799546	14541468	2.22	2.18	98.69	95.97	59.97	CRA011180
S1616M597-2	18511832	18233190	2.78	2.73	98.76	96.17	60.54	CRA011180
S1616M597-3	16267178	16044930	2.44	2.41	98.73	96.13	61.32	CRA011180

## Sheet: Table_S10
Extended data Table 10 Information of the marine biofilm metagenomes using for the analysis of S1616 and M597 distribution.
Sample name	Sample type	Sampling time	Sampling location	Reference	Accession
202009MG_1	Surface-ocean biofilm	SEP, 2020	Coastal water of the Maidao Island (36.05, 120.43)	Ding et al., 2023	SAMN22826277
202011MG_1	Surface-ocean biofilm	NOV, 2020	Coastal water of the Maidao Island (36.05, 120.43)	Ding et al., 2023	SAMN22826278
202101MG_1	Surface-ocean biofilm	JAN, 2021	Coastal water of the Maidao Island (36.05, 120.43)	Ding et al., 2023	SAMN22826279
202103MG_1	Surface-ocean biofilm	MAR, 2021	Coastal water of the Maidao Island (36.05, 120.43)	Ding et al., 2023	SAMN22826280
202105MG_1	Surface-ocean biofilm	MAY, 2021	Coastal water of the Maidao Island (36.05, 120.43)	Ding et al., 2023	SAMN22826281
202107MG_1	Surface-ocean biofilm	JUL, 2021	Coastal water of the Maidao Island (36.05, 120.43)	Ding et al., 2023	SAMN22826282
B-USA1	Surface-ocean biofilm	NOV, 2017	Coastal water of the Sapelo Island (31.42, -81.30)	Zhang et al., 2019	SRX3823708
B-USA2	Surface-ocean biofilm	NOV, 2017	Coastal water of the Sapelo Island (31.42, -81.30)	Zhang et al., 2019	SRX3823709
B-USA3	Surface-ocean biofilm	NOV, 2017	Coastal water of the Sapelo Island (31.42, -81.30)	Zhang et al., 2019	SRX3823710
B-RSA1	Surface-ocean biofilm	APR, 2016	Red Sea (22.20, 39.03)	Zhang et al., 2019	SRX3823434
B-RSA2	Surface-ocean biofilm	APR, 2016	Red Sea (22.20, 39.03)	Zhang et al., 2019	SRX3823433
B-RSA3	Surface-ocean biofilm	APR, 2016	Red Sea (22.20, 39.03)	Zhang et al., 2019	SRX3823436
B-RSB1	Surface-ocean biofilm	APR, 2016	Red Sea (22.20, 39.04)	Zhang et al., 2019	SRX3823435
B-RSB2	Surface-ocean biofilm	APR, 2016	Red Sea (22.20, 39.04)	Zhang et al., 2019	SRX3823437
B-RSB3	Surface-ocean biofilm	APR, 2016	Red Sea (22.20, 39.04)	Zhang et al., 2019	SRX3823443
B-RSC1	Surface-ocean biofilm	APR, 2016	Red Sea (22.20, 39.05)	Zhang et al., 2019	SRX3823442
B-RSC2	Surface-ocean biofilm	APR, 2016	Red Sea (22.20, 39.05)	Zhang et al., 2019	SRX3823441
B-RSC3	Surface-ocean biofilm	APR, 2016	Red Sea (22.20, 39.05)	Zhang et al., 2019	SRX3823440
B-RSiii1	Surface-ocean biofilm	JUN, 2016	Red Sea (22.20, 39.04)	Zhang et al., 2019	SRX3823444
B-RSiii2	Surface-ocean biofilm	JUN, 2016	Red Sea (22.20, 39.04)	Zhang et al., 2019	SRX3823439
B-RSiii3	Surface-ocean biofilm	JUN, 2016	Red Sea (22.20, 39.04)	Zhang et al., 2019	SRX3823438
B-HK13071	Surface-ocean biofilm	JUL, 2013	Hong Kong Water (22.34, 114.27)	Zhang et al., 2019	SRX3809807
B-HK13072	Surface-ocean biofilm	JUL, 2013	Hong Kong Water (22.34, 114.27)	Zhang et al., 2019	SRX3809808
B-HK13073	Surface-ocean biofilm	JUL, 2013	Hong Kong Water (22.34, 114.27)	Zhang et al., 2019	SRX3809805
B-HK14071	Surface-ocean biofilm	JUL, 2014	Hong Kong Water (22.34, 114.27)	Zhang et al., 2019	SRX3809806
B-HK14072	Surface-ocean biofilm	JUL, 2014	Hong Kong Water (22.34, 114.27)	Zhang et al., 2019	SRX3809804
B-HK14073	Surface-ocean biofilm	JUL, 2014	Hong Kong Water (22.34, 114.27)	Zhang et al., 2019	SRX3809803
B-HK15041	Surface-ocean biofilm	APR, 2015	Hong Kong Water (22.34, 114.27)	Zhang et al., 2019	SRX3809819
B-HK15042	Surface-ocean biofilm	APR, 2015	Hong Kong Water (22.34, 114.27)	Zhang et al., 2019	SRX3809809
B-HK15043	Surface-ocean biofilm	APR, 2015	Hong Kong Water (22.34, 114.27)	Zhang et al., 2019	SRX3809813
B-HK15051	Surface-ocean biofilm	MAY, 2015	Hong Kong Water (22.34, 114.27)	Zhang et al., 2019	SRX3809812
B-HK15052	Surface-ocean biofilm	MAY, 2015	Hong Kong Water (22.34, 114.27)	Zhang et al., 2019	SRX3809811
B-HK15053	Surface-ocean biofilm	MAY, 2015	Hong Kong Water (22.34, 114.27)	Zhang et al., 2019	SRX3809810
B-HK15071	Surface-ocean biofilm	JUL, 2015	Hong Kong Water (22.34, 114.27)	Zhang et al., 2019	SRX3809818
B-HK15072	Surface-ocean biofilm	JUL, 2015	Hong Kong Water (22.34, 114.27)	Zhang et al., 2019	SRX3809817
B-HK15073	Surface-ocean biofilm	JUL, 2015	Hong Kong Water (22.34, 114.27)	Zhang et al., 2019	SRX3809816
B-HK15091	Surface-ocean biofilm	SEP, 2015	Hong Kong Water (22.34, 114.27)	Zhang et al., 2019	SRX3809814
B-HK15092	Surface-ocean biofilm	SEP, 2015	Hong Kong Water (22.34, 114.27)	Zhang et al., 2019	SRX3809815
B-HK16041	Surface-ocean biofilm	APR, 2016	Hong Kong Water (22.34, 114.27)	Zhang et al., 2019	SRX3809916
B-HK16042	Surface-ocean biofilm	APR, 2016	Hong Kong Water (22.34, 114.27)	Zhang et al., 2019	SRX3809917
B-HK16043	Surface-ocean biofilm	APR, 2016	Hong Kong Water (22.34, 114.27)	Zhang et al., 2019	SRX3809918
B-HK16051	Surface-ocean biofilm	MAY, 2016	Hong Kong Water (22.34, 114.27)	Zhang et al., 2019	SRX3809924
B-HK16052	Surface-ocean biofilm	MAY, 2016	Hong Kong Water (22.34, 114.27)	Zhang et al., 2019	SRX3809923
B-HK16053	Surface-ocean biofilm	MAY, 2016	Hong Kong Water (22.34, 114.27)	Zhang et al., 2019	SRX3809920
B-HK16061	Surface-ocean biofilm	JUN, 2016	Hong Kong Water (22.34, 114.27)	Zhang et al., 2019	SRX3809919
B-HK16062	Surface-ocean biofilm	JUN, 2016	Hong Kong Water (22.34, 114.27)	Zhang et al., 2019	SRX3809922
B-HK16063	Surface-ocean biofilm	JUN, 2016	Hong Kong Water (22.34, 114.27)	Zhang et al., 2019	SRX3809921
B-HK16071	Surface-ocean biofilm	JUL, 2016	Hong Kong Water (22.34, 114.27)	Zhang et al., 2019	SRX3809914
B-HK16072	Surface-ocean biofilm	JUL, 2016	Hong Kong Water (22.34, 114.27)	Zhang et al., 2019	SRX3809913
B-HK16073	Surface-ocean biofilm	JUL, 2016	Hong Kong Water (22.34, 114.27)	Zhang et al., 2019	SRX3809912
B-HK16081	Surface-ocean biofilm	AUG, 2016	Hong Kong Water (22.34, 114.27)	Zhang et al., 2019	SRX3809909
B-HK16082	Surface-ocean biofilm	AUG, 2016	Hong Kong Water (22.34, 114.27)	Zhang et al., 2019	SRX3809911
B-HK16083	Surface-ocean biofilm	AUG, 2016	Hong Kong Water (22.34, 114.27)	Zhang et al., 2019	SRX3809915
B-HK16091	Surface-ocean biofilm	SEP, 2016	Hong Kong Water (22.34, 114.27)	Zhang et al., 2019	SRX3809908
B-HK16092	Surface-ocean biofilm	SEP, 2016	Hong Kong Water (22.34, 114.27)	Zhang et al., 2019	SRX3809907
B-HK16093	Surface-ocean biofilm	SEP, 2016	Hong Kong Water (22.34, 114.27)	Zhang et al., 2019	SRX3809910
B-HK17061	Surface-ocean biofilm	JUN, 2017	Hong Kong Water (22.34, 114.27)	Zhang et al., 2019	SRX3809801
B-HK17062	Surface-ocean biofilm	JUN, 2017	Hong Kong Water (22.34, 114.27)	Zhang et al., 2019	SRX3809800
B-HK17063	Surface-ocean biofilm	JUN, 2017	Hong Kong Water (22.34, 114.27)	Zhang et al., 2019	SRX3809799
B-HK17071	Surface-ocean biofilm	JUL, 2017	Hong Kong Water (22.34, 114.27)	Zhang et al., 2019	SRX3809798
B-HK17072	Surface-ocean biofilm	JUL, 2017	Hong Kong Water (22.34, 114.27)	Zhang et al., 2019	SRX3809797
B-HK17073	Surface-ocean biofilm	JUL, 2017	Hong Kong Water (22.34, 114.27)	Zhang et al., 2019	SRX3809791
B-HK17091	Surface-ocean biofilm	SEP, 2017	Hong Kong Water (22.34, 114.27)	Zhang et al., 2019	SRX3809792
B-HK17092	Surface-ocean biofilm	SEP, 2017	Hong Kong Water (22.34, 114.27)	Zhang et al., 2019	SRX3809789
B-HK17093	Surface-ocean biofilm	SEP, 2017	Hong Kong Water (22.34, 114.27)	Zhang et al., 2019	SRX3809790
B-HK17111	Surface-ocean biofilm	NOV, 2017	Hong Kong Water (22.34, 114.27)	Zhang et al., 2019	SRX3809793
B-HK17112	Surface-ocean biofilm	NOV, 2017	Hong Kong Water (22.34, 114.27)	Zhang et al., 2019	SRX3809795
B-TIANamp1	Surface-ocean biofilm	DEC, 2017	Hong Kong Water (22.34, 114.27)	Zhang et al., 2019	SRX3809820
B-TIANamp2	Surface-ocean biofilm	DEC, 2017	Hong Kong Water (22.34, 114.27)	Zhang et al., 2019	SRX3809821
B-AllPrep1	Surface-ocean biofilm	DEC, 2017	Hong Kong Water (22.34, 114.27)	Zhang et al., 2019	SRX3809824
B-AllPrep2	Surface-ocean biofilm	DEC, 2017	Hong Kong Water (22.34, 114.27)	Zhang et al., 2019	SRX3809825
B-DNeasy1	Surface-ocean biofilm	DEC, 2017	Hong Kong Water (22.34, 114.27)	Zhang et al., 2019	SRX3809822
B-DNeasy2	Surface-ocean biofilm	DEC, 2017	Hong Kong Water (22.34, 114.27)	Zhang et al., 2019	SRX3809823
B-C1	Surface-ocean biofilm	DEC, 2017	Hong Kong Water (22.34, 114.27)	Zhang et al., 2019	SRX3809796
B-C2	Surface-ocean biofilm	DEC, 2017	Hong Kong Water (22.34, 114.27)	Zhang et al., 2019	SRX3809794
B-AL1	Surface-ocean biofilm	MAR, 2017	Hong Kong Water (22.34, 114.27)	Zhang et al., 2019	SRX3823419
B-AL2	Surface-ocean biofilm	MAR, 2017	Hong Kong Water (22.34, 114.27)	Zhang et al., 2019	SRX3823418
B-PEEK1	Surface-ocean biofilm	MAR, 2017	Hong Kong Water (22.34, 114.27)	Zhang et al., 2019	SRX3823426
B-PEEK2	Surface-ocean biofilm	MAR, 2017	Hong Kong Water (22.34, 114.27)	Zhang et al., 2019	SRX3823422
B-PTFE1	Surface-ocean biofilm	MAR, 2017	Hong Kong Water (22.34, 114.27)	Zhang et al., 2019	SRX3823412
B-PTFE2	Surface-ocean biofilm	MAR, 2017	Hong Kong Water (22.34, 114.27)	Zhang et al., 2019	SRX3823413
B-PVC1	Surface-ocean biofilm	MAR, 2017	Hong Kong Water (22.34, 114.27)	Zhang et al., 2019	SRX3823424
B-PVC2	Surface-ocean biofilm	MAR, 2017	Hong Kong Water (22.34, 114.27)	Zhang et al., 2019	SRX3823425
B-SS1	Surface-ocean biofilm	MAR, 2017	Hong Kong Water (22.34, 114.27)	Zhang et al., 2019	SRX3823417
B-SS2	Surface-ocean biofilm	MAR, 2017	Hong Kong Water (22.34, 114.27)	Zhang et al., 2019	SRX3823423
B-TI1	Surface-ocean biofilm	MAR, 2017	Hong Kong Water (22.34, 114.27)	Zhang et al., 2019	SRX3823421
B-TI2	Surface-ocean biofilm	MAR, 2017	Hong Kong Water (22.34, 114.27)	Zhang et al., 2019	SRX3823420
B-Beach1	Surface-ocean biofilm	MAY, 2017	Hong Kong Water (22.34, 114.27)	Zhang et al., 2019	SRX3823414
B-Beach2	Surface-ocean biofilm	MAY, 2017	Hong Kong Water (22.34, 114.27)	Zhang et al., 2019	SRX3823415
B-Rock1	Surface-ocean biofilm	MAY, 2017	Hong Kong Water (22.34, 114.27)	Zhang et al., 2019	SRX3823416
B-Rock2	Surface-ocean biofilm	MAY, 2017	Hong Kong Water (22.34, 114.27)	Zhang et al., 2019	SRX3823427
B-YSO	Surface-ocean biofilm	JUN, 2017	Yung Shu O Bay (22.43, 114.28)	Zhang et al., 2019	SRX3809802
B-ECS2	Surface-ocean biofilm	AUG, 2017	East China Sea (30.70, 122.82)	Zhang et al., 2019	SRX3823712
B-ECS3	Surface-ocean biofilm	AUG, 2017	East China Sea (30.70, 122.82)	Zhang et al., 2019	SRX3823715
B-ECS4	Surface-ocean biofilm	AUG, 2017	East China Sea (30.70, 122.82)	Zhang et al., 2019	SRX3823714
B-ECS5	Surface-ocean biofilm	AUG, 2017	East China Sea (30.70, 122.82)	Zhang et al., 2019	SRX3823716
B-ECS6	Surface-ocean biofilm	AUG, 2017	East China Sea (30.70, 122.82)	Zhang et al., 2019	SRX3823717
B-ECS7	Surface-ocean biofilm	AUG, 2017	East China Sea (30.70, 122.82)	Zhang et al., 2019	SRX3823713
B-ZH1	Surface-ocean biofilm	JUL,2017	Sourth China Sea (21.70, 114.35)	Zhang et al., 2019	SRX3823429
B-ZH2	Surface-ocean biofilm	JUL,2017	Sourth China Sea (21.70, 114.35)	Zhang et al., 2019	SRX3823430
B-ZH3	Surface-ocean biofilm	JUL,2017	Sourth China Sea (21.70, 114.67)	Zhang et al., 2019	SRX3823431
B-ZH4	Surface-ocean biofilm	JUL,2017	Sourth China Sea (21.70, 114.67)	Zhang et al., 2019	SRX3823432
B-ZH5	Surface-ocean biofilm	JUL,2017	Sourth China Sea (21.70, 114.67)	Zhang et al., 2019	SRX3823428
B-SY2	Surface-ocean biofilm	NOV, 2017	Sourth China Sea (18.23, 109.49)	Zhang et al., 2019	SRX3823720
B-SY4	Surface-ocean biofilm	NOV, 2017	Sourth China Sea (18.23, 109.49)	Zhang et al., 2019	SRX3823719
B-SY5	Surface-ocean biofilm	NOV, 2017	Sourth China Sea (18.23, 109.49)	Zhang et al., 2019	SRX3823718
B-SCS	Surface-ocean biofilm	JAN, 2018	Sourth China Sea (14.00, 116.00 )	Zhang et al., 2019	SRX3823711
3-GP-10_1	Marine-microplastics biofilm	NOV, 2021	Coastal water of the Huangdao Island (35.54, 120.08)	Qin et al., 2023	SAMN31761114
3-GP-10_2	Marine-microplastics biofilm	NOV, 2021	Coastal water of the Huangdao Island (35.54, 120.08)	Qin et al., 2023	SAMN31761115
3-GP-10_3	Marine-microplastics biofilm	NOV, 2021	Coastal water of the Huangdao Island (35.54, 120.08)	Qin et al., 2023	SAMN31761116
0.3-GP-10_1	Marine-microplastics biofilm	NOV, 2021	Coastal water of the Huangdao Island (35.54, 120.08)	Qin et al., 2023	SAMN31761120
0.3-GP-10_2	Marine-microplastics biofilm	NOV, 2021	Coastal water of the Huangdao Island (35.54, 120.08)	Qin et al., 2023	SAMN31761121
0.3-GP-10_3	Marine-microplastics biofilm	NOV, 2021	Coastal water of the Huangdao Island (35.54, 120.08)	Qin et al., 2023	SAMN31761122
3-MP-10_1	Marine-microplastics biofilm	NOV, 2021	Coastal water of the Huangdao Island (35.54, 120.08)	Qin et al., 2023	SAMN31761117
3-MP-10_2	Marine-microplastics biofilm	NOV, 2021	Coastal water of the Huangdao Island (35.54, 120.08)	Qin et al., 2023	SAMN31761118
3-MP-10_3	Marine-microplastics biofilm	NOV, 2021	Coastal water of the Huangdao Island (35.54, 120.08)	Qin et al., 2023	SAMN31761119
0.3-MP-10_1	Marine-microplastics biofilm	NOV, 2021	Coastal water of the Huangdao Island (35.54, 120.08)	Qin et al., 2023	SAMN31761123
0.3-MP-10_2	Marine-microplastics biofilm	NOV, 2021	Coastal water of the Huangdao Island (35.54, 120.08)	Qin et al., 2023	SAMN31761124
0.3-MP-10_3	Marine-microplastics biofilm	NOV, 2021	Coastal water of the Huangdao Island (35.54, 120.08)	Qin et al., 2023	SAMN31761125
3-GP-20_1	Marine-microplastics biofilm	NOV, 2021	Coastal water of the Huangdao Island (35.54, 120.08)	Qin et al., 2023	SAMN31761129
3-GP-20_2	Marine-microplastics biofilm	NOV, 2021	Coastal water of the Huangdao Island (35.54, 120.08)	Qin et al., 2023	SAMN31761130
3-GP-20_3	Marine-microplastics biofilm	NOV, 2021	Coastal water of the Huangdao Island (35.54, 120.08)	Qin et al., 2023	SAMN31761131
0.3-GP-20_1	Marine-microplastics biofilm	NOV, 2021	Coastal water of the Huangdao Island (35.54, 120.08)	Qin et al., 2023	SAMN31761135
0.3-GP-20_2	Marine-microplastics biofilm	NOV, 2021	Coastal water of the Huangdao Island (35.54, 120.08)	Qin et al., 2023	SAMN31761136
0.3-GP-20_3	Marine-microplastics biofilm	NOV, 2021	Coastal water of the Huangdao Island (35.54, 120.08)	Qin et al., 2023	SAMN31761137
3-MP-20_1	Marine-microplastics biofilm	NOV, 2021	Coastal water of the Huangdao Island (35.54, 120.08)	Qin et al., 2023	SAMN31761132
3-MP-20_2	Marine-microplastics biofilm	NOV, 2021	Coastal water of the Huangdao Island (35.54, 120.08)	Qin et al., 2023	SAMN31761133
3-MP-20_3	Marine-microplastics biofilm	NOV, 2021	Coastal water of the Huangdao Island (35.54, 120.08)	Qin et al., 2023	SAMN31761134
0.3-MP-20_1	Marine-microplastics biofilm	NOV, 2021	Coastal water of the Huangdao Island (35.54, 120.08)	Qin et al., 2023	SAMN31761138
0.3-MP-20_2	Marine-microplastics biofilm	NOV, 2021	Coastal water of the Huangdao Island (35.54, 120.08)	Qin et al., 2023	SAMN31761139
0.3-MP-20_3	Marine-microplastics biofilm	NOV, 2021	Coastal water of the Huangdao Island (35.54, 120.08)	Qin et al., 2023	SAMN31761140
